# Supplementary material
Source: PubMed Central journal article supplement (PMC4070068)
Supplement: mmc1.pdf [file mmc1.pdf]

1  
2  
3  
4  
5  
6  
7  
8  
9  
10  
11  
12

## Supporting Material

### **Amyloids of alpha synuclein affect the structure and dynamics of supported lipid bilayers**

Aditya Iyer<sup>†‡</sup>, Nils O. Petersen<sup>‡§</sup>, Mireille M.A.E Claessens<sup>‡</sup> and Vinod Subramaniam<sup>†‡\*</sup>

<sup>†</sup>Nanoscale Biophysics Group, FOM Institute AMOLF, Amsterdam, The Netherlands.

<sup>‡</sup>Nanobiophysics Group, MESA+ Institute for Nanotechnology,

University of Twente, Enschede, The Netherlands.

<sup>§</sup>Department of Chemistry, University of Alberta, Edmonton, Canada.

## Table of Contents

|    |                                                                                                                  |
|----|------------------------------------------------------------------------------------------------------------------|
| 1  |                                                                                                                  |
| 2  |                                                                                                                  |
| 3  | 1. Fig S1: Optimizing thresholding parameters for cluster analysis.                                              |
| 4  | 2. Fig S2: Aggregation kinetics of $\alpha$ S variants at 37°C monitored by ThT fluorescence.                    |
| 5  | 3. Fig S3: Adsorption of WT- $\alpha$ S on POPC:POPG (50:50) SLBs.                                               |
| 6  | 4. Fig S4: Adsorption of $\alpha$ S( $\Delta$ 71-82) on POPC:POPG (50:50) SLBs.                                  |
| 7  | 5. Fig S5: Adsorption of $\alpha$ S on POPC : POPG (75:25) SLBs.                                                 |
| 8  | 6. Fig S6: Aggregate area histograms of WT- $\alpha$ S and $\alpha$ S( $\Delta$ 71-82) formed on POPC:POPG SLBs. |
| 9  | 7. Fig S7: Lipid fluorescence in buffer above SLBs after $\alpha$ S incubation on POPC:POPG SLBs.                |
| 10 | 8. Table S1: Cluster sizes of $\alpha$ S on POPC: POPG supported lipid bilayers.                                 |
| 11 |                                                                                                                  |

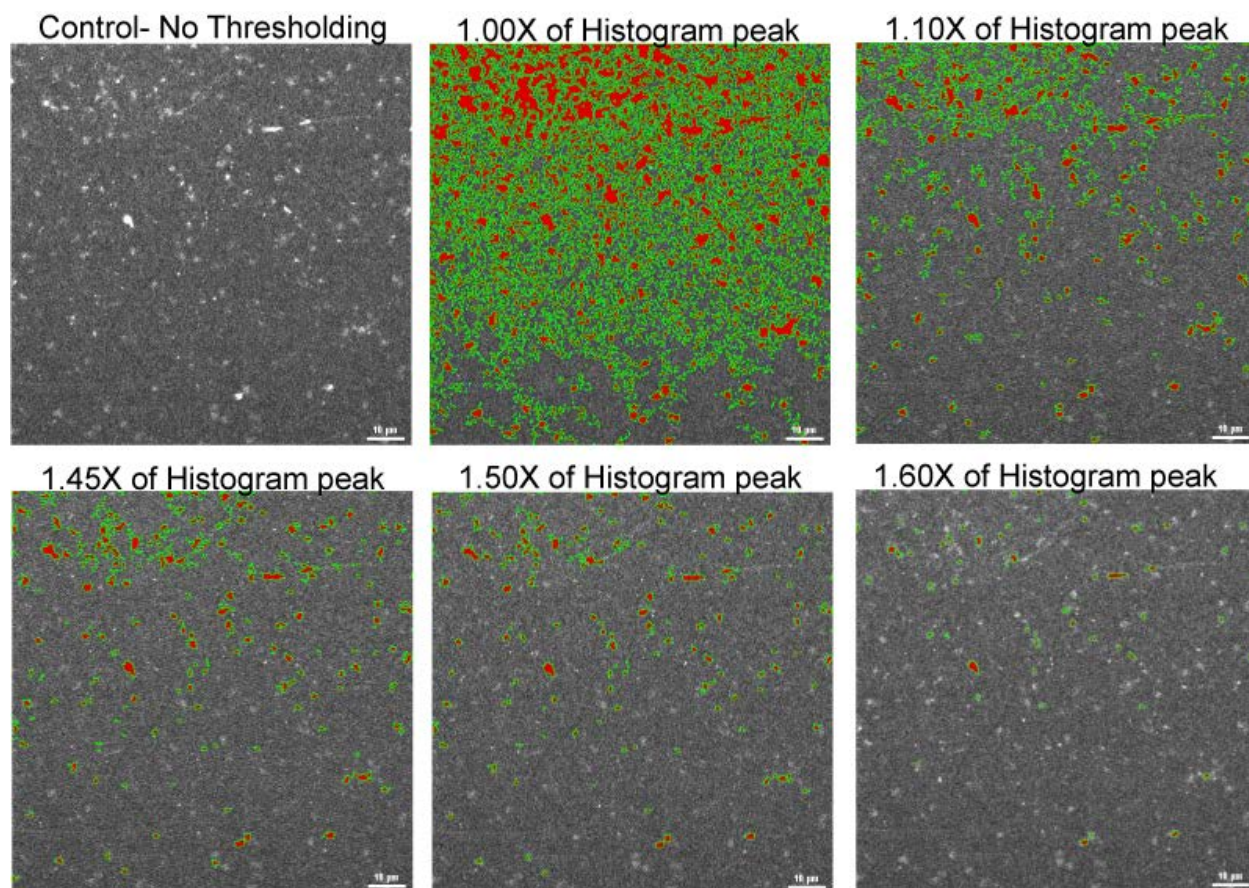

1

2 **Fig S1: Optimizing thresholding parameters for cluster analysis.** Using the Nikon NIS  
 3 Elements software, the *ObjectCount* plugin was used to set an intensity threshold. To choose an  
 4 optimum threshold, the thresholding point was varied along the intensity histogram in the protein  
 5 channel. As seen in the figure, a thresholding value of 1.60X leads to exclusion of certain  
 6 aggregates and a value up to 1.45X leads to over-estimation of cluster sizes. Thus 1.50X was  
 7 chosen as a thresholding value for all images. All images were taken at room temperature in 50  
 8 mM HEPES, 0.1 mM EDTA, pH 7.4 buffer.

9

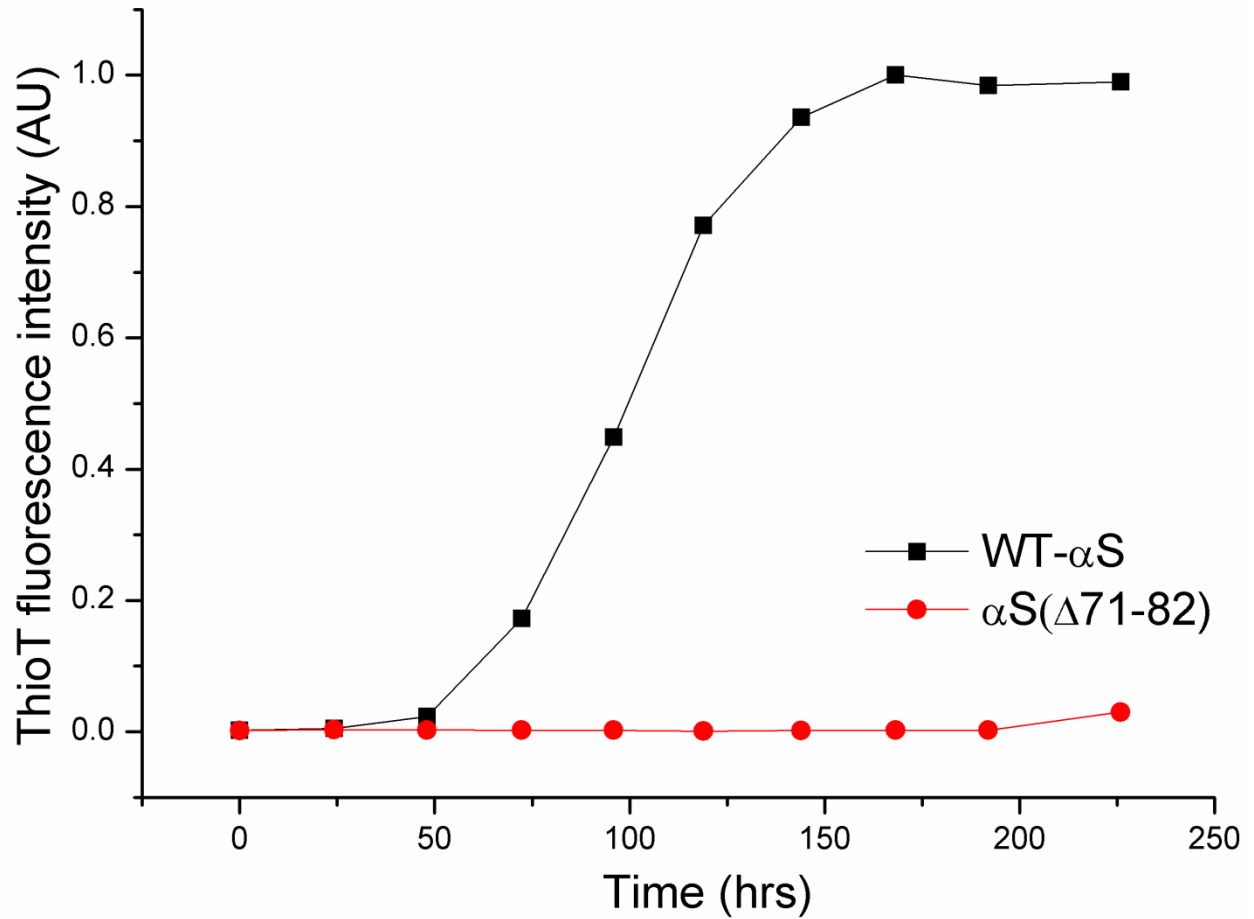

1

2 **Fig S2: Aggregation kinetics of αS variants at 37°C monitored by ThT fluorescence.**

3 The aggregation reaction was carried out using 50 mM HEPES, 0.1 mM EDTA at 300rpm  
4 constant orbital shaking conditions in a fluorescence microplate reader. The protein  
5 concentration was kept at 100 μM and the ThT concentration was 10 μM.

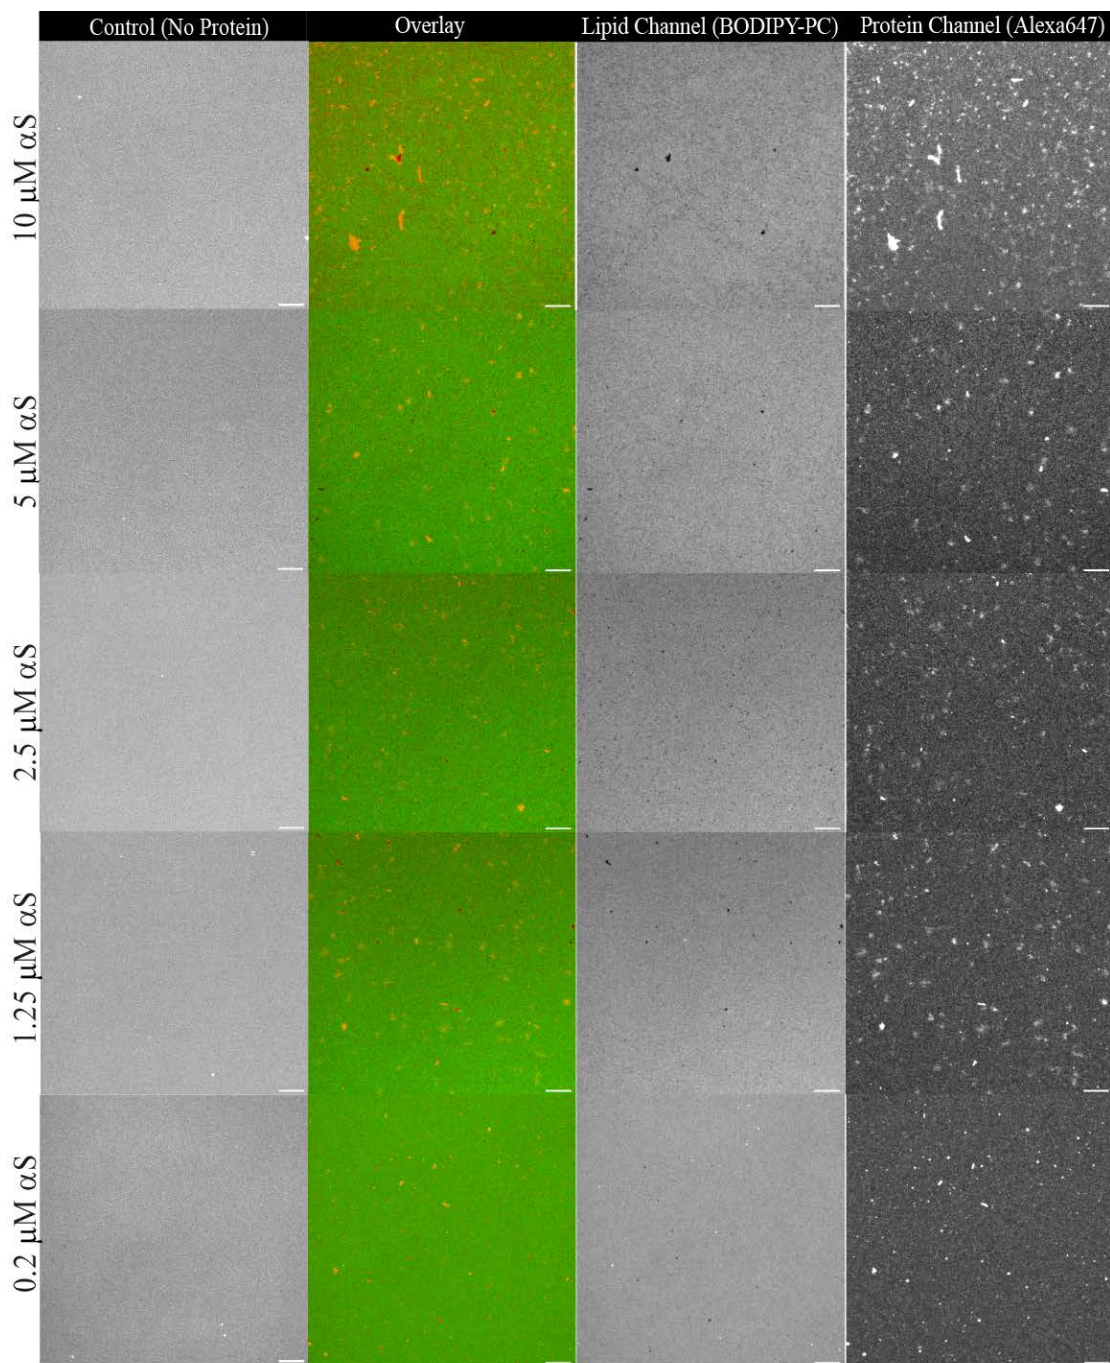

1

2 **Fig S3: Adsorption of WT- $\alpha$ S on POPC:POPG (50:50) SLBs.** Representative confocal  
3 images of SLBs before (control) and after addition of increasing amounts of WT- $\alpha$ S (labeled to  
4 AlexaFluor 647). 0.25 mol% of BODIPY-PC was incorporated as a fluorescent lipid probe in  
5 SLBs. The lipid channel clearly shows increasing membrane damage in form of defects and  
6 cracks as the protein concentration is increased from 0.2  $\mu$ M WT- $\alpha$ S to 10  $\mu$ M WT- $\alpha$ S.  
7 Correspondingly the cluster sizes also seem to increase upon increasing protein concentration.  
8 Images are contrasted to the same extent to facilitate proper comparison. All images were taken  
9 at room temperature in 50 mM HEPES, 0.1 mM EDTA, pH 7.4 buffer. The scale bar is 10  $\mu$ m.

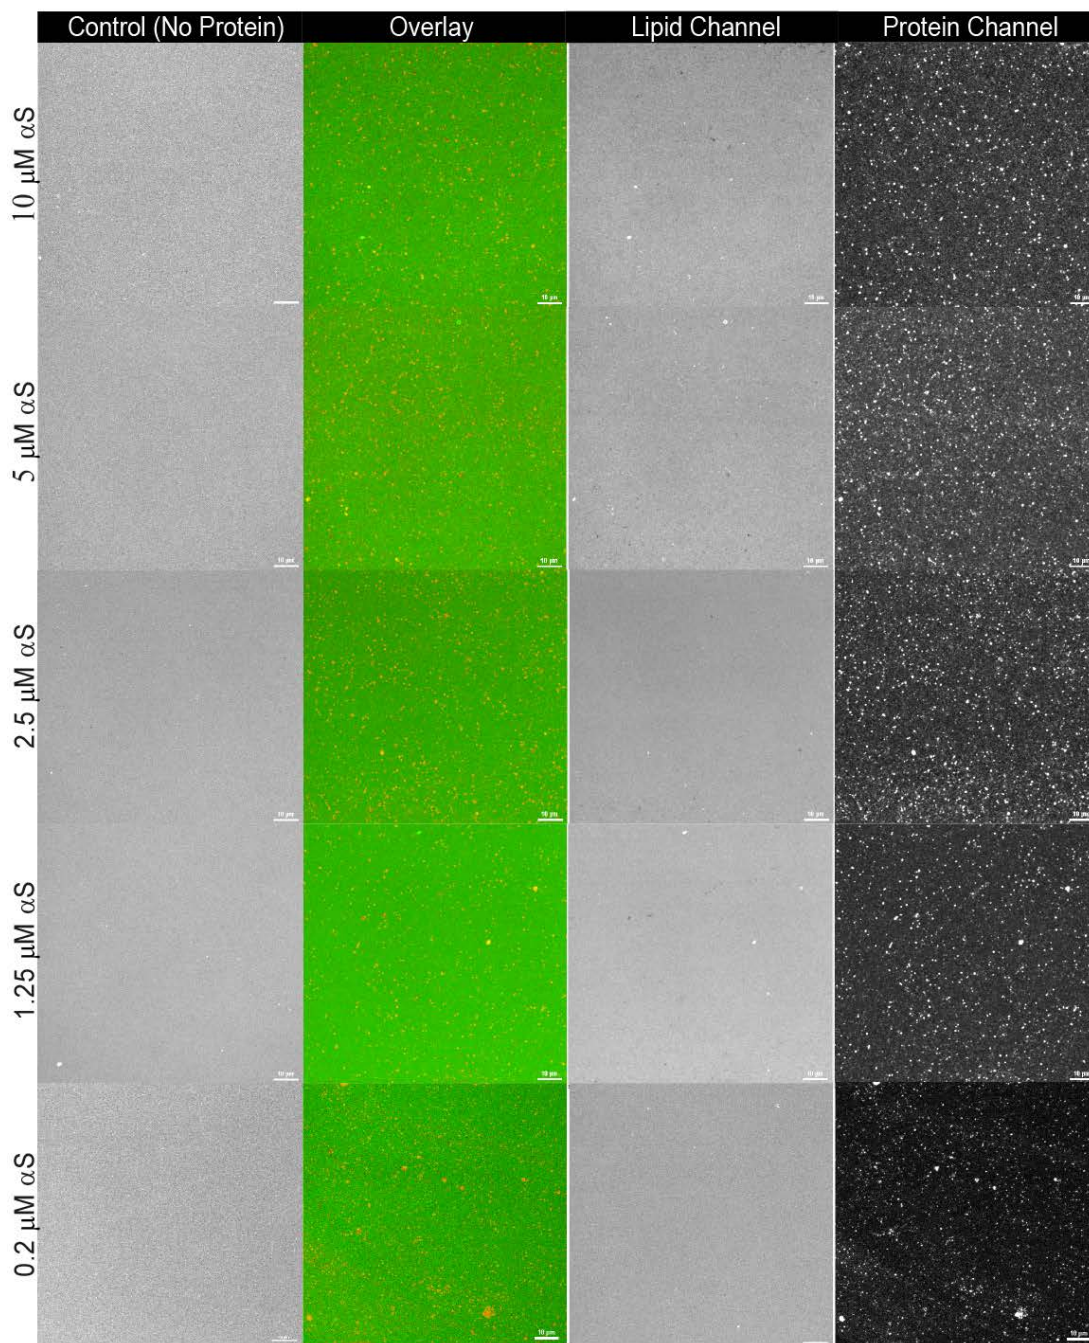

1

2 **Fig S4: Adsorption of  $\alpha$ S( $\Delta$ 71-82) on POPC:POPG (50:50) SLBs.** Representative confocal  
3 images of SLBs before (control) and after addition of increasing amounts of  $\alpha$ S( $\Delta$ 71-82) mutant  
4 which was labeled to AlexaFluor 647. 0.25 mol% of BODIPY-PC was incorporated as a  
5 fluorescent lipid probe in SLBs. The above images show clearly no effect of incubation of  
6  $\alpha$ S( $\Delta$ 71-82) as the concentration is increased from 0.20  $\mu$ M to 10  $\mu$ M. There is hardly any  
7 significant damage seen across this concentration range. Correspondingly the cluster sizes also  
8 do not show a difference. Images are contrasted to the same extent to facilitate proper  
9 comparison. All images were taken at room temperature in 50 mM HEPES, 0.1 mM EDTA, pH  
10 7.4 buffer. The scale bar is 10  $\mu$ m.

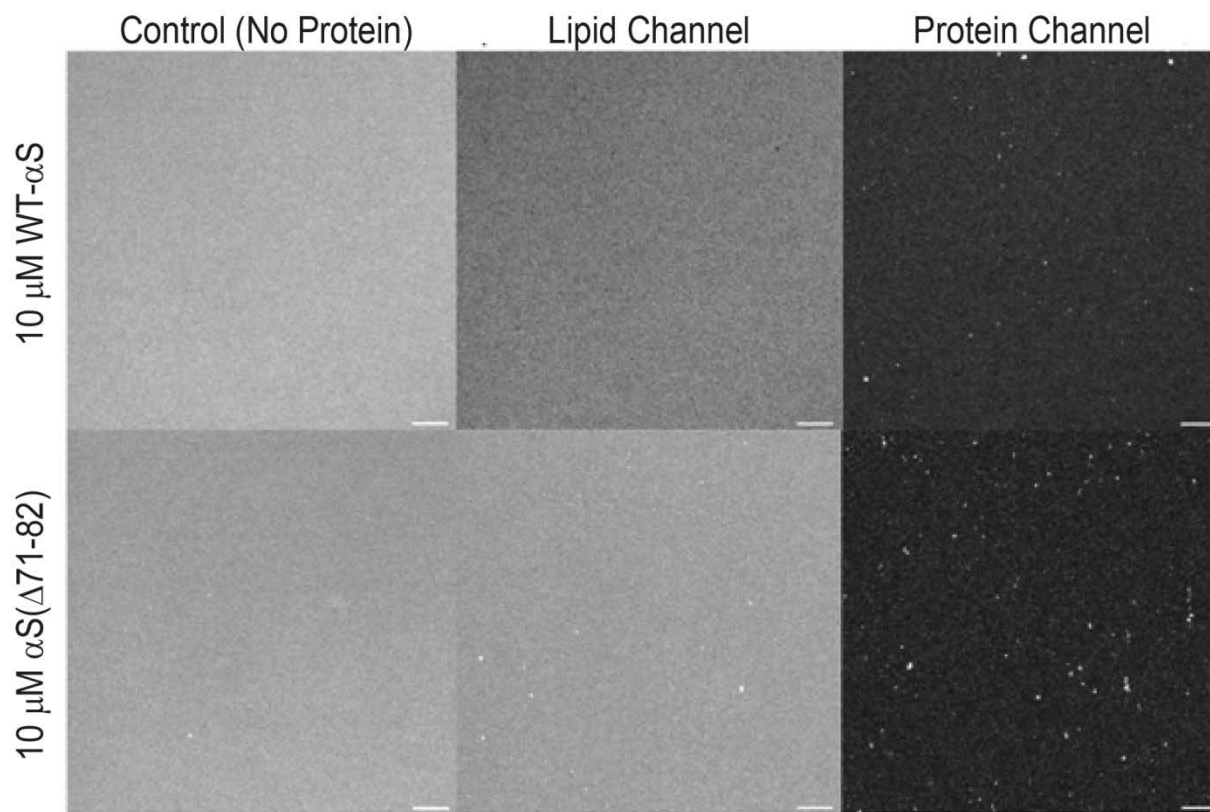

1

2 **Fig S5: Adsorption of  $\alpha$ S on POPC : POPG (75:25) SLBs.** Representative images of adsorption of 10  
3  $\mu$ M  $\alpha$ S after an 18 hour incubation period. The lipid channel shows very small defects and fluorescence  
4 intensity loss with the WT- $\alpha$ S (top panels), whereas no such effects are seen with  $\alpha$ S( $\Delta$ 71-82) (lower  
5 panels). Images are contrasted to the same extent to facilitate proper comparison. All experiments were  
6 performed at room temperature in 50 mM HEPES, pH 7.4, 0.1 mM EDTA buffer. The scale bar is 10  $\mu$ m.

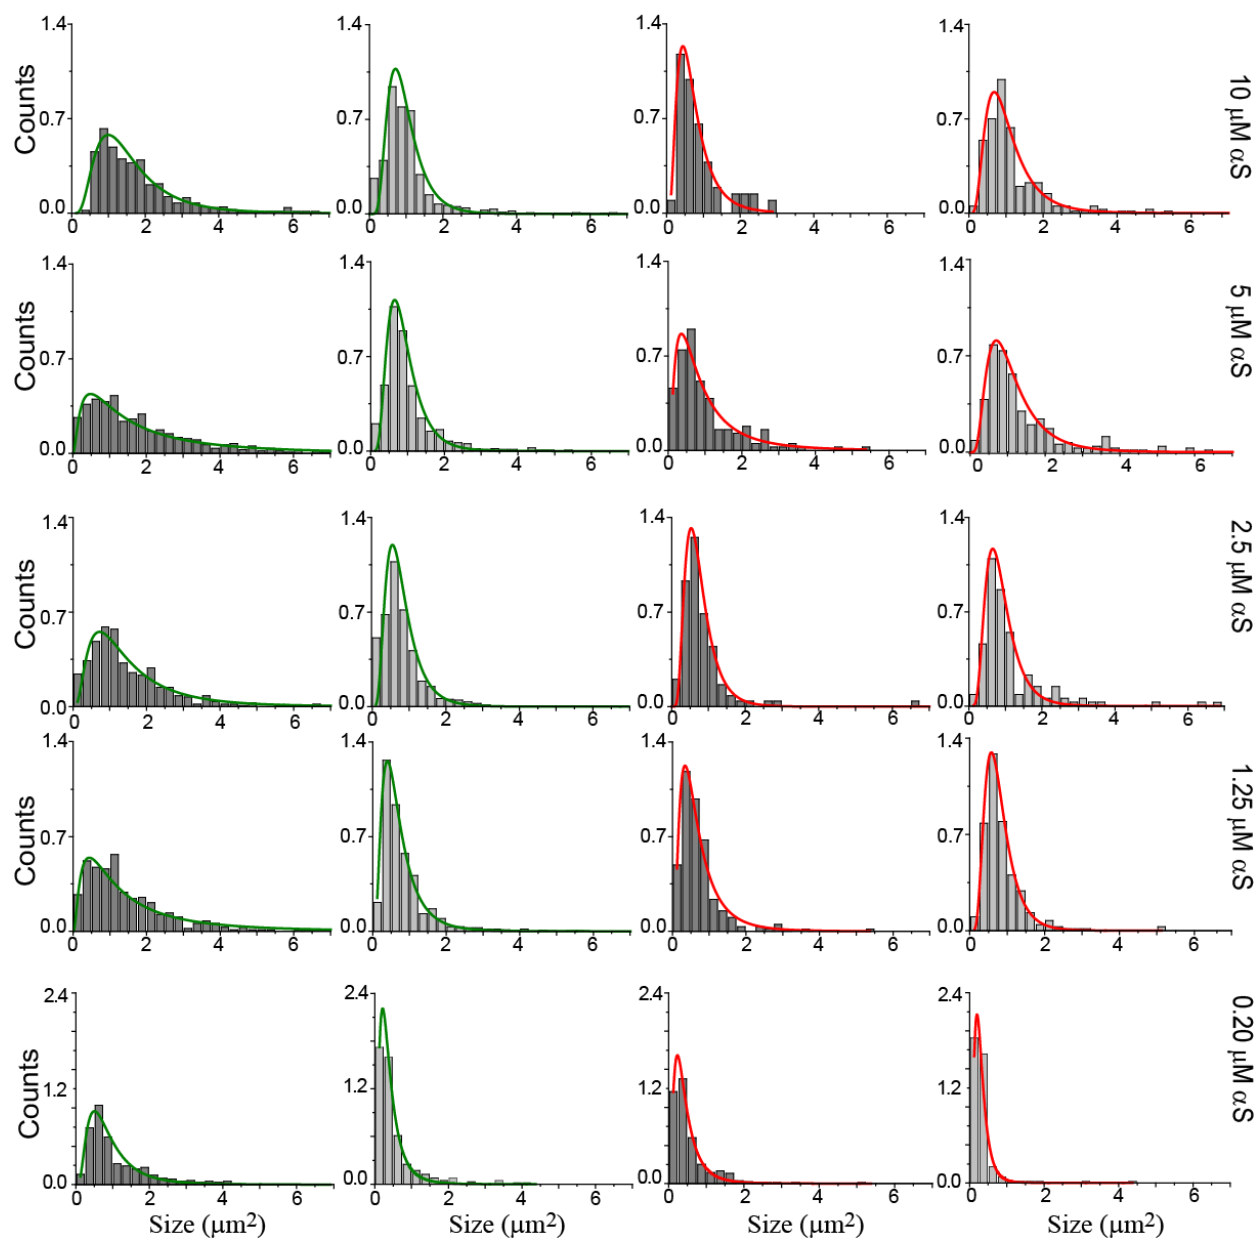

1

2 **Fig S6: Aggregate area histograms of WT- $\alpha$ S and  $\alpha$ S( $\Delta$ 71-82) formed on POPC:POPG**  
 3 **SLBs.** Using the ObjectCount plugin in the Nikon NIS Elements software, a distribution of the  
 4 aggregate areas was obtained. These distributions were area normalized to 1 and were fitted to a  
 5 log-normal distribution. The WT- $\alpha$ S aggregate area distributions are represented by dark grey  
 6 bars and the  $\alpha$ S( $\Delta$ 71-82) aggregate area distributions are represented by light grey bars. The  
 7 aggregates of WT- $\alpha$ S, show a wider distribution (green fits) in 50% POPG SLBs as compared to  
 8 the WT- $\alpha$ S in 25% POPG SLBs (red fits).

9



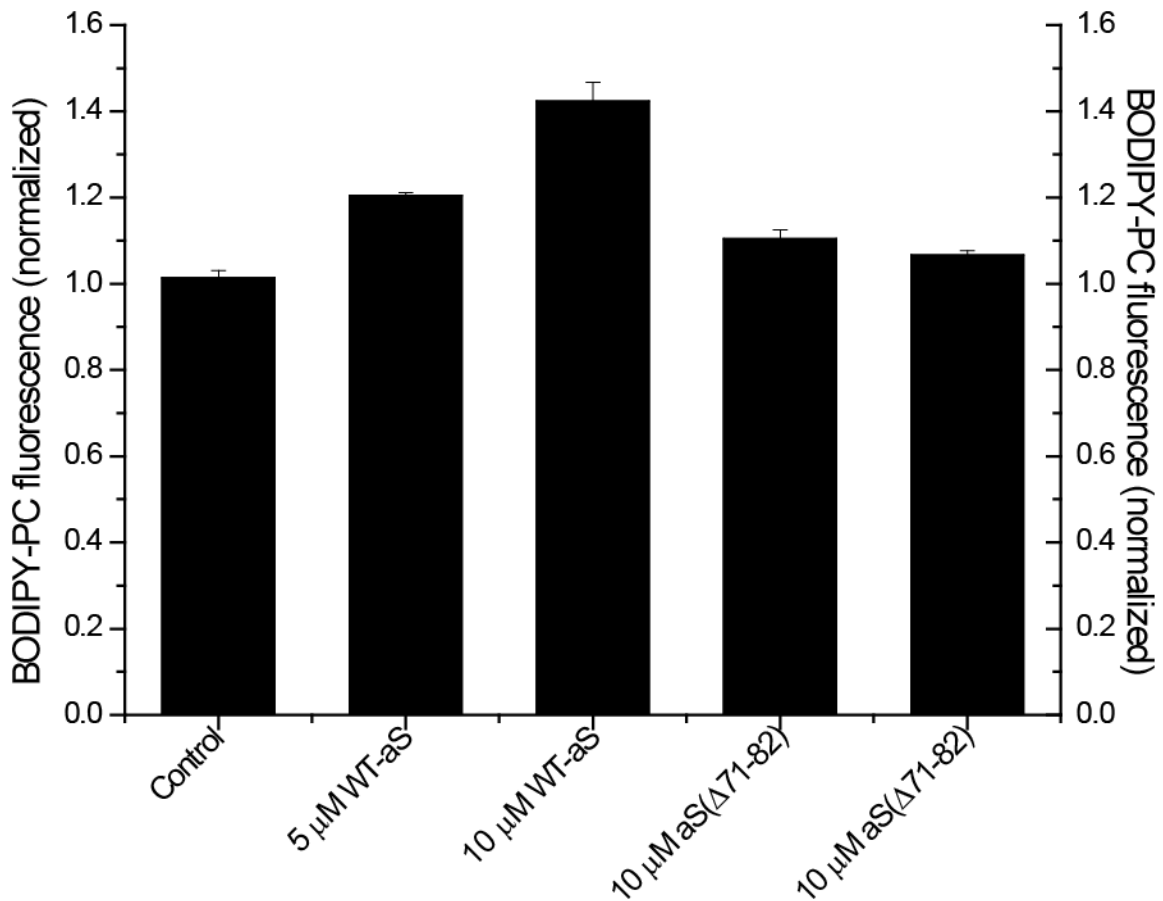

1

2 **Fig S7: Lipid fluorescence in buffer after  $\alpha\text{S}$  incubation on POPC:POPG SLBs.** Relative  
 3 increase in BODIPY-PC fluorescence seen in the buffer above the SLBs after incubation of  $\alpha\text{S}$   
 4 variants over POPC: POPG (50:50) SLBs. All values were obtained by normalizing against the  
 5 fluorescence obtained from buffer before incubation of  $\alpha\text{S}$  variant. All experiments were  
 6 performed at room temperature in 50 mM HEPES, 0.1 mM EDTA, pH 7.4 buffer.

7

|                                                                            | Protein Concentration ( $\mu\text{M}$ ) | Cluster area ( $\mu\text{m}^2$ ) | Number of clusters analysed | Width (s) of curve | Adjusted R- square |
|----------------------------------------------------------------------------|-----------------------------------------|----------------------------------|-----------------------------|--------------------|--------------------|
| <b>WT-<math>\alpha\text{S}</math> on POPC:POPG (50:50) SLBs</b>            | 10                                      | $1.41 \pm 0.02$                  | 589                         | 0.58               | 0.96               |
|                                                                            | 5                                       | $1.50 \pm 0.08$                  | 440                         | 1.09               | 0.95               |
|                                                                            | 2.5                                     | $1.27 \pm 0.07$                  | 447                         | 0.75               | 0.91               |
|                                                                            | 1.25                                    | $1.21 \pm 0.05$                  | 415                         | 0.99               | 0.93               |
|                                                                            | 0.20                                    | $0.78 \pm 0.03$                  | 394                         | 0.66               | 0.94               |
| <b>WT-<math>\alpha\text{S}</math> on POPC:POPG (75:25) SLBs</b>            | 10                                      | $0.77 \pm 0.06$                  | 85                          | 0.60               | 0.97               |
|                                                                            | 5                                       | $0.78 \pm 0.03$                  | 156                         | 0.87               | 0.93               |
|                                                                            | 2.5                                     | $0.68 \pm 0.02$                  | 99                          | 0.50               | 0.98               |
|                                                                            | 1.25                                    | $0.58 \pm 0.02$                  | 237                         | 0.72               | 0.97               |
|                                                                            | 0.20                                    | $0.38 \pm 0.01$                  | 332                         | 0.71               | 0.99               |
| <b><math>\alpha\text{S}(\Delta 71-82)</math> on POPC:POPG (50:50) SLBs</b> | 10                                      | $0.95 \pm 0.02$                  | 880                         | 0.47               | 0.94               |
|                                                                            | 5                                       | $0.85 \pm 0.01$                  | 656                         | 0.49               | 0.96               |
|                                                                            | 2.5                                     | $0.72 \pm 0.03$                  | 676                         | 0.51               | 0.85               |
|                                                                            | 1.25                                    | $0.61 \pm 0.08$                  | 1202                        | 0.64               | 0.99               |
|                                                                            | 0.20                                    | $0.34 \pm 0.02$                  | 307                         | 0.70               | 0.99               |
| <b><math>\alpha\text{S}(\Delta 71-82)</math> on POPC:POPG (75:25) SLBs</b> | 10                                      | $0.93 \pm 0.02$                  | 303                         | 0.55               | 0.93               |
|                                                                            | 5                                       | $0.95 \pm 0.05$                  | 283                         | 0.57               | 0.96               |
|                                                                            | 2.5                                     | $0.81 \pm 0.02$                  | 139                         | 0.46               | 0.93               |
|                                                                            | 1.25                                    | $0.68 \pm 0.04$                  | 277                         | 0.47               | 0.98               |
|                                                                            | 0.20                                    | $0.27 \pm 0.02$                  | 208                         | 0.41               | 0.94               |

- 1
- 2 **Table S8: Cluster sizes of  $\alpha\text{S}$  on POPC: POPG supported lipid bilayers.**
- 3 The above table depicts cluster sizes obtained by fitting the area histograms by a log normal distribution.
- 4 At least 10 images were obtained and used for calculating the cluster areas. The error bars indicate
- 5 standard errors for each measurement.
- 6
