# Supplementary material
Source: PubMed Central journal article supplement (PMC4070068)
Supplement: mmc2.pdf [file mmc2.pdf]

# Amyloids of Alpha-Synuclein Affect the Structure and Dynamics of Supported Lipid Bilayers

Aditya Iyer,<sup>†‡</sup> Nils O. Petersen,<sup>‡§</sup> Mireille M. A. E. Claessens,<sup>‡</sup> and Vinod Subramaniam<sup>†‡\*</sup>

<sup>†</sup>Nanoscale Biophysics Group, FOM Institute AMOLF, Amsterdam, The Netherlands; <sup>‡</sup>Nanobiophysics Group, MESA+ Institute for Nanotechnology and MIRA Institute for Biomedical Technology and Technical Medicine, University of Twente, Enschede, The Netherlands; and <sup>§</sup>Department of Chemistry, University of Alberta, Edmonton, Alberta, Canada

**ABSTRACT** Interactions of monomeric alpha-synuclein ( $\alpha$ S) with lipid membranes have been suggested to play an important role in initiating aggregation of  $\alpha$ S. We have systematically analyzed the distribution and self-assembly of monomeric  $\alpha$ S on supported lipid bilayers. We observe that at protein/lipid ratios higher than 1:10,  $\alpha$ S forms micrometer-sized clusters, leading to observable membrane defects and decrease in lateral diffusion of both lipids and proteins. An  $\alpha$ S deletion mutant lacking amino-acid residues 71–82 binds to membranes, but does not observably affect membrane integrity. Although this deletion mutant cannot form amyloid, significant amyloid formation is observed in the wild-type  $\alpha$ S clusters. These results suggest that the process of amyloid formation, rather than binding of  $\alpha$ S on membranes, is crucial in compromising membrane integrity.

## INTRODUCTION

The 14.4-kDa neuronal protein  $\alpha$ S is a major component of Lewy bodies, which are a pathological hallmark of Parkinson's disease (1). Neuronal death has been attributed to various causes (2–6), all of which involve the aggregation of  $\alpha$ S into amyloid structures. Above a critical concentration,  $\alpha$ S aggregates in vitro into oligomers and fibrils (7), with the details of aggregation depending on pH (8), salt (9), and temperature (8) conditions. There is increasing evidence that interactions with lipid bilayers play a role in  $\alpha$ S aggregation (10,11), although there have been some unresolved debates in earlier literature (12,13).

Alpha-synuclein-lipid membrane interactions depend on the negative charge on the membrane (12). These interactions are mediated by positively charged residues located in seven imperfect repeats in the N-terminus of the protein (14,15). These repeats are reminiscent of lipid-membrane binding domains in apolipoproteins, with the first five repeats predicted and shown to form  $\alpha$ -helices upon binding to negatively charged small unilamellar vesicles (SUVs) (16,17).

In vitro, the presence of negatively charged lipid membranes accelerates  $\alpha$ S aggregation into amyloids (12). For other amyloid-forming proteins like A $\beta$  and IAPP, membrane integrity is affected by extensive membrane remodeling and lipid extraction (18–23). There is increasing evidence that this is also the case for  $\alpha$ S (11,24–27). Further, the report of measurable amounts of lipids in Lewy bodies (6) strongly suggests that the interaction of lipid membranes with  $\alpha$ S is relevant in the aggregation process.

One of the major reasons for neuronal cell death in Parkinson's disease is membrane damage (28–30). It is un-

certain whether certain oligomeric species or the aggregation process itself causes the observed membrane damage. Moreover, the exact mechanism of this damage remains to be elucidated. Both monomers and oligomers of WT- $\alpha$ S have been shown to cause dye leakage in model membrane vesicles, consistent with a pore-like mechanism (31–34). However, this leakage is observed only at high surface charge densities indicating that other mechanisms may be important at physiologically relevant charge densities. WT- $\alpha$ S oligomers with a putative channel-like structure have been shown to induce single ion-channel currents in lipid membranes (35). Recent reports also indicate that addition of monomeric wild-type  $\alpha$ S (WT- $\alpha$ S) causes membrane damage in supported lipid bilayers (SLBs) (24,26). Thus, it is unclear whether membrane damage is due to  $\alpha$ S amyloid formation on the membrane or is a result of binding of  $\alpha$ S species to the membrane. To distinguish between these two mechanisms for membrane damage, we studied a deletion mutant lacking amino-acid residues 71–82 ( $\alpha$ S ( $\Delta$ 71–82)) that in solution fails to form amyloids but forms spherical oligomers with a diameter of ~20 nm (36).

We used SLBs as a platform to visualize and measure the interactions of WT- $\alpha$ S and  $\alpha$ S( $\Delta$ 71–82) with membranes by confocal microscopy using fluorescently labeled SLBs and  $\alpha$ S. We indirectly modulated the rate of aggregation of  $\alpha$ S on the membrane surface by varying the negative lipid composition and thereby modulating the density of surface-bound protein. The presence of a charged protein on a charged membrane surface can influence lateral lipid diffusion and protein-protein interactions. We used fluorescence recovery after photobleaching (FRAP) to measure changes in the lateral diffusion coefficients of lipids to extract quantitative information about lipid phase and fluidity. FRAP was also used to probe diffusion of  $\alpha$ S and its aggregation on the SLB surface. We observe that formation of amyloids by WT- $\alpha$ S results in lipid extraction and

Submitted January 31, 2014, and accepted for publication May 1, 2014.

\*Correspondence: [subramaniam@amolf.nl](mailto:subramaniam@amolf.nl)

Editor: Claudia Steinem.

© 2014 by the Biophysical Society  
0006-3495/14/06/2585/10 \$2.00

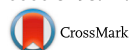

<http://dx.doi.org/10.1016/j.bpj.2014.05.001>

decreases the mobility of lipids in SLBs. Neither effect is observed with the deletion mutant even though it binds membranes with comparable affinity.

## MATERIALS AND METHODS

Stock solutions of POPC (1-palmitoyl-2-oleoyl-*sn*-glycero-3-phosphocholine), POPG (1-palmitoyl,2-oleoyl phosphatidylglycerol), and NBD-PC (1-palmitoyl-2-[6-[(7-nitro-2-1,3-benzoxadiazol-4-yl)amino]hexanoyl]-*sn*-glycero-3-phosphocholine) in chloroform were purchased from Avanti Polar Lipids (Birmingham, AL) and used without further purification. EDTA (ethylenediaminetetraacetic acid) was purchased from Sigma Chemical (St. Louis, MO). NaCl (sodium chloride), NaOH (sodium hydroxide), and HEPES (4-(2-hydroxyethyl)-1-piperazineethanesulfonic acid) were purchased from Merck (Darmstadt, Germany). Alexa Fluor 647 C2 maleimide and  $\beta$ -BODIPY FL C5-HPC (2-(4,4-difluoro-5,7-dimethyl-4-bora-3a,4a-diaza-s-indacene-3-pentanoyl)-1-hexadecanoyl-*sn*-glycero-3-phosphocholine) was purchased from Invitrogen (Carlsbad, CA).

### Substrate pretreatment

Glass coverslips were washed in 2% Hellmanex (VWR International, Chicago, IL) at 80°C for 60 min, rinsed exhaustively with deionized water, and then dried with a stream of nitrogen. The slides were etched for 8 min in a solution of 3:1 (v/v) concentrated sulfuric acid (H<sub>2</sub>SO<sub>4</sub>) and 30% hydrogen peroxide (H<sub>2</sub>O<sub>2</sub>). The slides were stored in Milli-Q water (Millipore, Billerica, MA), and were used within 3 days after treatment.

### Vesicle and supported lipid bilayer preparation

Lipid stock solutions of POPC and POPG in chloroform were mixed in 1:1 or 3:1 molar ratios, dried under a stream of nitrogen, and placed under vacuum for 1 h. After drying, the lipid films were rehydrated in 100 mM NaCl solution. Large unilamellar vesicles (~500  $\mu$ M in lipids) were prepared by extruding the solution 21 times through 100 nm polycarbonate membranes. The vesicles were stored at 4°C and used within 3 days. Supported lipid bilayers were formed by vesicle fusion inside a 120  $\mu$ L custom-built chamber on appropriately treated glass slides. The extruded vesicles were mixed with 750 mM NaCl solution at a 1:1 ratio to induce fusion as reported in Pandey et al. (37). After 20 min incubation, excess vesicles were removed from the chamber by rinsing with a 50 mM HEPES, 0.1 mM EDTA, and 750 mM NaCl, pH 7.4 buffer. Thereafter the chamber was rinsed with 50 mM HEPES, 0.1 mM EDTA, pH 7.4 buffer to remove salt. At least 3 mL of buffer were passed through the chamber to ensure complete solvent exchange.

### Expression, purification, and labeling of $\alpha$ S

Because WT- $\alpha$ S does not contain any cysteine residues necessary for fluorescent labeling, an alanine to cysteine mutation was introduced at residue 140. The WT- $\alpha$ S-A140C mutant was expressed in *Escherichia coli* strain BL21 (DE3) using the pT7-7 expression plasmid and purified in the presence of 1 mM DTT as previously reported in van Raaij et al. (38). The cDNAs for the deletion mutant of  $\alpha$ S lacking 71–82 residues ( $\alpha$ S( $\Delta$ 71–82)) were obtained from Prof. Benoit Giasson from the University of Florida (Gainesville, FL). The cDNA was cloned into a pT7-7 expression plasmid and purified. For labeling  $\alpha$ S( $\Delta$ 71–82), an alanine to cysteine mutation was introduced at residue 140 as for the WT- $\alpha$ S. Before labeling, both WT- $\alpha$ S-A140C and  $\alpha$ S( $\Delta$ 71–82)-A140C were reduced with a fivefold molar excess of DTT for 30 min at room temperature. The samples were desalted with Zeba desalting columns (Pierce, Rockford, IL), followed by the addition of a twofold molar excess of Alexa 647 (AL647) C2 maleimide

dye (Invitrogen) and incubated for 2 h in the dark at room temperature. Free label was removed using two desalting steps. The protein labeling efficiency was estimated to be 90% from the absorption spectrum. Before use, the protein was diluted with 50 mM HEPES, 0.1 mM EDTA, pH 7.4 buffer to the desired concentrations.

### Imaging of supported lipid bilayers and proteins

All measurements were performed on a model A1 confocal microscope equipped with a perfect focus system (Nikon, Tokyo, Japan). SLBs were visualized by incorporating 0.25 mol % BODIPY-PC. To visualize the proteins, a mixture of 25% labeled and 75% unlabeled protein was used. The SLBs were prepared as reported in Pandey et al. (37). In a typical experiment, exactly two times the chamber volume (~240  $\mu$ L) of the desired concentrations of the protein was flushed into the perfusion chamber with an oil-free pump. The proteins were incubated with the SLBs for 18 h at room temperature. Thereafter the unbound protein was washed off with 50 mM HEPES, 0.1 mM EDTA, pH 7.4 for 10 min to remove background fluorescence from the unbound protein in the solution. Although the washing step could potentially lead to desorption, within the time frame of the measurements we see <10% decrease in the protein fluorescence from these bilayer systems. Images were acquired using a 63 $\times$  water immersion, 1.30 NA objective combined with a 2 $\times$  optical zoom. The acquired images consisted of 512  $\times$  512 pixels with a pixel size of 0.41  $\times$  0.41  $\mu$ m. All images were collected under identical conditions of power and gain. For visualization purposes only, the contrast threshold was set to a constant value, allowing comparison of all images.

### Image processing and cluster analysis

The NIS ELEMENTS ObjectCount module (Nikon) was used for area estimation of  $\alpha$ S clusters. Using intensity thresholding, areas of  $\alpha$ S clusters were calculated automatically from the pixel areas in at least 10 images per protein concentration. Because the number of clusters and their sizes depend directly on the level of the threshold set, we systematically varied the threshold (see Fig. S1 in the Supporting Material) to choose an optimum threshold. For each image, the intensity threshold was fixed to 1.5 times the peak intensity of its intensity histogram, avoiding under- or over-sampling. The cluster area distribution for each protein concentration was fit to a log-normal distribution to get an average cluster area (39).

### Fluorescence recovery after photobleaching

FRAP was used to determine the diffusivity of lipids in the bilayer and of the labeled protein on the lipid bilayer after incubation. FRAP was performed on a model A1 confocal microscope (Nikon). A 100-mW Argon ion laser (488 nm; Coherent, Santa Clara, CA) was used to both bleach and monitor the lipid bilayer fluorescence. A 30-mW laser (647 nm; Coherent) was used to bleach and monitor protein fluorescence. In the FRAP experiment, fluorescence from a circular region of interest (ROI) was bleached (radius ~12  $\mu$ m) in 1.5 s. After bleaching, the increase in fluorescence intensity in the ROI was monitored for 8 min. During the experiment, there was only a minimal drop in the fluorescence intensity in the reference ROI. All FRAP data were fitted using the Soumpasis fit (40), which has been shown to better model membrane/protein diffusivity than a single exponential fit (41), yielding the diffusion coefficients and mobile fractions of the probed entity.

### Circular dichroism spectroscopy

A model J-715 spectropolarimeter (Jasco, Tokyo, Japan) was used to obtain circular dichroism (CD) spectra at protein concentrations of 3  $\mu$ M in solution. Spectra were recorded between 190 and 260 nm with a step size of

0.5 nm and a scanning speed of 10 nm/min using a 1-mm path length cuvette. The apparent dissociation constants ( $Kd_{app}$ ) for both proteins were determined by titrating them against POPC/POPG (50:50) SUVs and fitting the measured mean residue ellipticity at 222 nm,  $R$ , to the solution of the binding equilibrium equation:

$$P + \frac{L}{n} \leftrightarrow R. \quad (1)$$

By assuming equilibrium binding and applying the law of mass action, solving for  $R$ , we obtain

$$R = R_o - (R_o - R_f) \times \frac{Kd_{app} + P + \frac{L}{n} + \sqrt{\left(Kd_{app} + P + \frac{L}{n}\right)^2 - 4P\frac{L}{n}}}{2P}, \quad (2)$$

where  $R$  is the measured signal (MRE (Mean Residual Ellipticity) at 222 nm, corrected for dilution) at a given lipid concentration,  $L$  is the total lipid concentration, and  $P$  is the total concentration of the protein.  $Kd_{app}$  is the apparent macroscopic dissociation equilibrium constant, and  $n$  is the binding stoichiometry (lipids/protein). The values  $R_f$  and  $R_o$  are the final (corrected for dilution) and initial mean residue ellipticities, respectively. This equation assumes that all lipid-binding sites are equivalent and that  $Kd_{app}$  does not depend on the lipid/protein ratio ( $L/P$ ) (42). Because  $\alpha S$  adopts a helical conformation upon membrane binding (16), titration of WT- $\alpha S$  and  $\alpha S(\Delta 71-82)$  with POPC/POPG (1:1) SUVs allows an estimate of  $Kd_{app}$  from the characteristic band at 222 nm.

## RESULTS

### WT- $\alpha S$ and $\alpha S(\Delta 71-82)$ bind lipid membranes with comparable affinities

To compare the clustering and possible aggregation of WT- $\alpha S$  and  $\alpha S(\Delta 71-82)$  on lipid membranes, the binding of both proteins to SLBs has to be comparable. We used CD spectroscopy to measure binding affinities of  $\alpha S(\Delta 71-82)$  and WT- $\alpha S$  to POPC/POPG (1:1) SUVs (42) (Materials and Methods). The data (Fig. 1) show that the binding affinities of both constructs to the lipid bilayer are comparable. Although the WT- $\alpha S$  and  $\alpha S(\Delta 71-82)$  exhibit similar binding affinities to lipid membranes, they show different aggregation behavior in solution. In absence of membranes,  $\alpha S(\Delta 71-82)$  does not form fibrillar amyloids (36) and aggregation arrests at an oligomeric stage (43), whereas WT- $\alpha S$  readily aggregates into cross- $\beta$ -sheet-rich amyloid structures. Aggregation experiments under our experimental conditions confirmed this reported difference in aggregation behavior (see Fig. S2).

### WT- $\alpha S$ and $\alpha S(\Delta 71-82)$ self-assemble differently on POPC/POPG (1:1) SLBs

Upon systematically varying the concentration of  $\alpha S$  on POPC/POPG (1:1) SLBs, we observed that both WT- $\alpha S$  and  $\alpha S(\Delta 71-82)$  organized into clusters on the SLB surface. Although the binding affinities of these proteins were com-

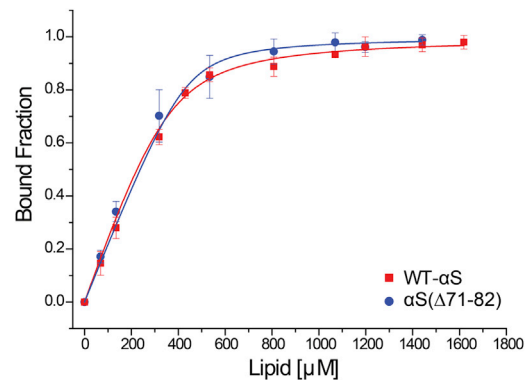

FIGURE 1 Binding of WT- $\alpha S$  and  $\alpha S(\Delta 71-82)$  with POPC/POPG liposomes. Titration of WT- $\alpha S$  (red squares) and  $\alpha S(\Delta 71-82)$  (blue circles) by POPC/POPG (50:50) SUVs. The bound fractions were obtained by measuring mean residual ellipticities at 222 nm by CD spectroscopy (Materials and Methods). The binding curve was generated by fitting normalized ellipticity values to Eq. 2 (solid lines), assuming equivalent binding sites. The error bars indicate standard deviations from three independent measurements. To see this figure in color, go online.

parable, there was a clear difference in the organization of these clusters (Fig. 2), obtained upon incubation of 10  $\mu M$  protein on SLBs after 18 h ( $P/L$  ratio  $\sim 1:1$ ).

WT- $\alpha S$  assembles into a heterogeneous distribution of clusters of both small and large areas, whereas clusters of  $\alpha S(\Delta 71-82)$  are more homogenous in size. Upon decreasing the  $P/L$  ratio, we observe that assembly of both WT- $\alpha S$  (see

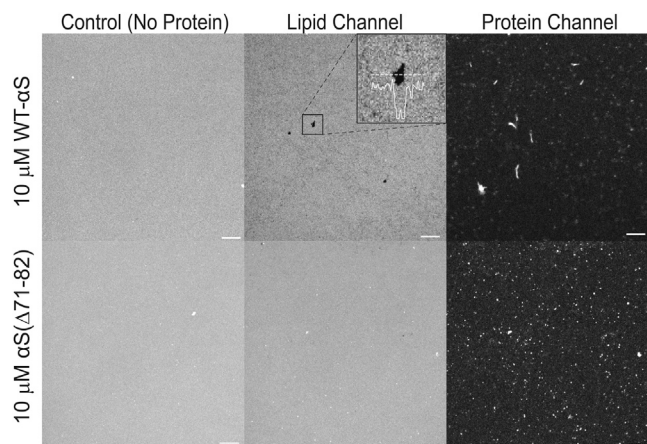

FIGURE 2 Clustering of WT- $\alpha S$  and  $\alpha S(\Delta 71-82)$  on POPC/POPG supported lipid bilayers. Representative images of SLBs after adsorption of 10  $\mu M$   $\alpha S$  for 18 h. The protein images show bigger and more heterogeneous WT- $\alpha S$  protein aggregates on 50% POPG-containing bilayers as compared to those of  $\alpha S(\Delta 71-82)$  mutant. There appears to be little correlation between the defects on the SLBs and the bigger aggregates. The lipid images show the appearance of cracks and defects in the top panels (WT- $\alpha S$ ). (Inset) Enhanced magnification. The sparse lipid clustering (seen as bright spots) was also seen in the controls and  $\alpha S(\Delta 71-82)$  aggregates do not seem to have a preference for these regions. Fewer and smaller defects appear in the presence of  $\alpha S(\Delta 71-82)$  and the average intensity remains the same. Images are contrasted to the same extent to facilitate comparison. All experiments were performed at room temperature in 50 mM HEPES, pH 7.4, 0.1 mM EDTA buffer. The scale bar is 10  $\mu m$ .

Fig. S3) and  $\alpha$ S( $\Delta$ 71–82) clusters (see Fig. S4) are sensitive to protein concentration, with cluster size increasing as a function of protein concentration. To obtain a quantitative overview of protein cluster size, we estimated average cluster areas (Materials and Methods) by fitting the measured area distribution to a log-normal distribution. Fig. 3 depicts the correlation between the protein concentration and average cluster areas.

As shown in Fig. 3, we obtained  $\alpha$ S cluster areas from incubation of WT- $\alpha$ S and  $\alpha$ S( $\Delta$ 71–82) on POPC/POPG (75:25) SLBs (see Fig. S5). This experiment was done to investigate whether the percentage of negatively-charged lipids influenced the clustering of  $\alpha$ S on SLBs. The WT- $\alpha$ S clusters are consistently smaller on less negatively charged SLBs (i.e., 25 vs. 50% POPG content). The histograms of the cluster areas (see Fig. S6) show a more heterogeneous distribution (larger widths) for the WT- $\alpha$ S clusters at all concentrations. The smallest calculated cluster area using our thresholding parameters is  $0.04 \mu\text{m}^2$ , which corresponds to the pixel area in the image. We cannot make any conclusive predictions about the size or aggregation number (number of monomers) of  $\alpha$ S structures inducing membrane damage. At these high  $P/L$  ratios (1:1), it has been previously reported that WT- $\alpha$ S forms amyloid structures depending on the percentage of negative charge in the lipid membranes (12). Our observations show a charge-dependent increase in the size of WT-clusters on SLBs at high  $P/L$ s.

To establish whether the observed WT- $\alpha$ S clusters contain amyloid, SLBs containing  $10 \mu\text{M}$  WT- $\alpha$ S clusters were incubated with  $50 \mu\text{M}$  of ThT (ThioflavinT) for 1 h. After washing off unbound ThT, most of the clusters seen

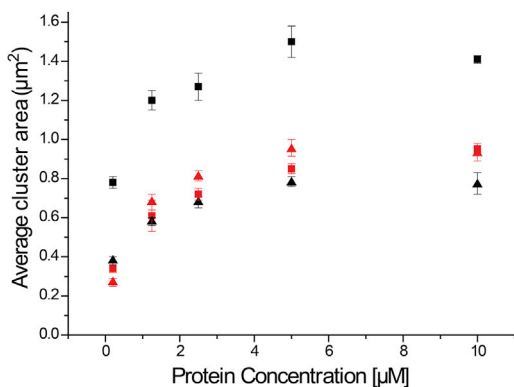

FIGURE 3 Average cluster areas of  $\alpha$ S on SLBs with changing protein concentration and lipid composition. Average cluster areas obtained by fitting the area distributions obtained from  $\alpha$ S aggregates on POPC/POPG SLBs. Upon increasing protein concentration, there is a twofold increase in the average cluster areas irrespective of the lipid composition for both WT- $\alpha$ S and  $\alpha$ S( $\Delta$ 71–82). However, for a given protein concentration,  $\alpha$ S( $\Delta$ 71–82) clusters (red symbols) show little dependence on lipid composition contrary to that observed for the WT- $\alpha$ S clusters (black symbols). Cluster areas for WT- $\alpha$ S and  $\alpha$ S( $\Delta$ 71–82) on 50% POPG SLBs (squares) and 25% POPG SLBs (triangles). The error bars indicate standard errors in each case. The statistics underlying the values presented here are shown in Table S1 in the Supporting Material. To see this figure in color, go online.

in the protein channel were found to be positive for ThT fluorescence (Fig. 4), confirming the formation of amyloid aggregates on the SLB surface (18,24). The average intensities in all ThT-positive clusters were at least 150 times higher than background intensities. It is interesting to note that not all clusters of WT- $\alpha$ S are positive for ThT fluorescence (Fig. 4 B).

To investigate whether the clusters of WT- $\alpha$ S can reorganize and grow into bigger amyloid aggregates, we incubated the aggregates formed from  $10 \mu\text{M}$  WT- $\alpha$ S after 18 h on POPC/POPG (1:1) SLBs for another 24 h. As expected for amyloid growth, we observe a marked increase in the protein aggregate size, as shown in Fig. 5. Closer inspection of the WT- $\alpha$ S amyloid aggregates in Fig. 5 show evidence of lipid fluorescence (arrows in Fig. 5). This may be a result of lipids being extracted out of the membrane upon amyloid formation. We see fewer protein aggregates at this stage, which suggests that smaller aggregates fuse into bigger structures; however, an alternative explanation could be that the aggregates desorb from the membrane.

### Aggregation of $\alpha$ S affects lipid membrane mobility

Protein aggregation on SLBs requires that the observed clusters are mobile on the bilayer. This mobility would be affected by the protein-protein interactions required for aggregation into amyloid fibrils. The dependence of protein clustering on lipid composition further suggests that there

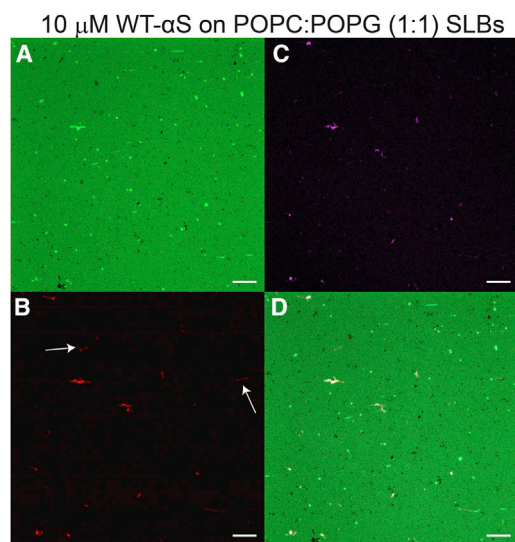

FIGURE 4 ThioflavinT (ThT) staining of WT- $\alpha$ S aggregates. Representative fluorescence images depicting the lipid channel (A) and protein channel (B) after 18 h incubation of  $10 \mu\text{M}$  labeled WT- $\alpha$ S on POPC/POPG SLB. (White arrows) Aggregates of WT- $\alpha$ S which are not positive for ThT. (C) Fluorescence images taken after ThT staining. (D) Overlay of all channels. Lipid composition of the bilayer was POPC/POPG/BODIPY-PC, 50:49.75:0.25 (mol/mol). All images were taken at room temperature in 50 mM HEPES, 0.1 mM EDTA, pH 7.4 buffer. The scale bar is  $10 \mu\text{m}$ . To see this figure in color, go online.

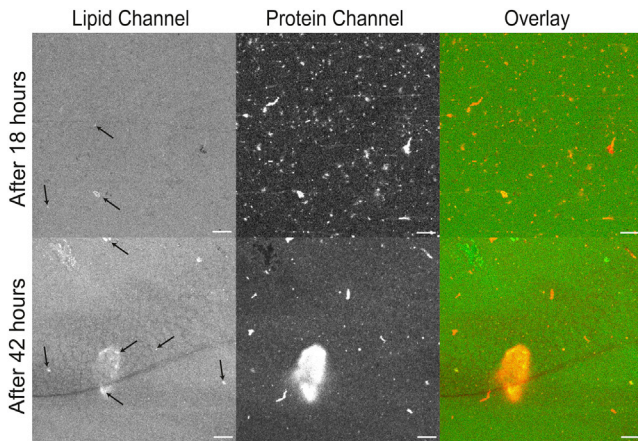

**FIGURE 5** Time-dependent growth of WT- $\alpha$ S aggregates on POPC/POPG (50:50) SLBs. The images shown are representative endpoint images obtained after incubation of 10  $\mu$ M WT- $\alpha$ S on POPC/POPG (50:50) after 18 h (top panel) and the same bilayer incubated for another 24 h (bottom panel). Upon incubation for 18 h, large aggregates are seen on the bilayer surface but these aggregates do not coincide with regions of high membrane damage. After 42 h, very large aggregates appear that in some regions appear to incorporate lipids. (Solid arrows) Lipids lining along the shape of the aggregate suggesting incorporation. Images are contrasted to the same extent to facilitate proper comparison. All experiments were performed at room temperature in 50 mM HEPES, pH 7.4, 0.1 mM EDTA buffer. The scale bar is 10  $\mu$ m. To see this figure in color, go online.

are specific lipid-protein interactions. To characterize the aggregation state of  $\alpha$ S, we used FRAP to probe the diffusion of WT- $\alpha$ S and  $\alpha$ S( $\Delta$ 71–82) on SLBs. We observed that at 10  $\mu$ M protein concentration the diffusion coefficient of WT- $\alpha$ S ( $D_{\alpha S}$ ) had a much lower value ( $\sim 0.14 \mu\text{m}^2/\text{s}$ ) than that for  $\alpha$ S( $\Delta$ 71–82) ( $\sim 1.1 \mu\text{m}^2/\text{s}$ ) (Fig. 6 A). The  $\alpha$ S ( $\Delta$ 71–82) mutant diffuses much faster than the WT- $\alpha$ S at all protein concentrations. We attribute the faster diffusion to significantly reduced interactions between  $\alpha$ S( $\Delta$ 71–82) species as compared to that of WT- $\alpha$ S. Consistent with strong protein-protein interactions and amyloid formation we observed a decrease (up to 30%) in the mobile fraction of the WT- $\alpha$ S species with increasing concentrations of the protein (Fig. 6 B).

The mobile fraction of  $\alpha$ S( $\Delta$ 71–82) does not change. We analyzed the average fluorescence intensities from the protein channel after incubation of labeled WT- $\alpha$ S and  $\alpha$ S( $\Delta$ 71–82) on POPC/POPG SLBs. SLBs incubated with different concentrations of WT- $\alpha$ S showed a linear increase in fluorescence intensity whereas SLBs with  $\alpha$ S( $\Delta$ 71–82) did not. Intriguingly, a similar trend was observed with WT- $\alpha$ S upon decreasing the percentage of negative lipids in the SLBs (Fig. 6 C). After incubation for 18 h, the unbound protein was washed off. Because the binding affinities of WT- $\alpha$ S and  $\alpha$ S( $\Delta$ 71–82) were comparable, the SLBs should be fully covered with  $\alpha$ S at all concentrations used. Thus, after the washing step, the fluorescence intensity should have been comparable for SLBs incubated with WT- $\alpha$ S and  $\alpha$ S( $\Delta$ 71–82). The fact that we see an increase in

fluorescence intensity with increasing concentration of WT- $\alpha$ S suggests direct adsorption of incoming WT- $\alpha$ S onto attached WT- $\alpha$ S species. A higher intensity could also be a result of compaction of existing aggregates into ordered structures, thereby creating space for incoming monomers.

To investigate the effect of  $\alpha$ S binding on lateral mobility of lipids in POPC/POPG SLBs, we used FRAP with BODIPY-PC as a fluorescent lipid probe. The diffusion coefficient of BODIPY-PC in the absence of protein was found to be  $\sim 1.25 \mu\text{m}^2/\text{s}$ , similar to values reported in the literature for lateral diffusion of lipids in SLBs on glass surfaces (44,45). The lipids were completely mobile (mobile fraction  $>98\%$ ) and SLBs were found to be stable over an incubation period of at least 42 h. Increasing concentrations of WT- $\alpha$ S ( $P/L$  ratios from 0.02 to 1) were incubated on separate SLBs for 18 h. After 18 h incubation with WT- $\alpha$ S, a drop in the diffusion coefficient of BODIPY-PC in SLBs was observed with increasing  $P/L$  values. At  $P/L < 0.1$ , there is little effect on the lipid bilayer fluidity, but starting from  $P/L \sim 0.1$ , we observe a drop in the diffusion coefficient of BODIPY-PC ( $D_B$ ) (Fig. 6 D). The mobile fraction of BODIPY-PC remained unchanged upon incubation of WT- $\alpha$ S and  $\alpha$ S( $\Delta$ 71–82) at all protein concentrations and lipid compositions.  $D_B$  dropped by  $\sim 55\%$  and  $\sim 30\%$  on 50% POPG and 25% POPG SLBs, respectively. Upon incubation of similar concentrations of  $\alpha$ S( $\Delta$ 71–82) on POPC/POPG SLBs, we found no change in the apparent diffusion coefficients of BODIPY-PC in either lipid composition as seen in Fig. 6 D. The increase in the protein aggregate size coincides with the drop in  $D_B$ . Thus, formation of small protein clusters is not enough to decrease the lateral diffusion of lipids, whereas aggregation of  $\alpha$ S into larger clusters and/or amyloids with typical cross- $\beta$  sheets is correlated with the decreased lateral diffusion of SLBs.

### Amyloid formation and lipid extraction are correlated

To probe the effects of WT- $\alpha$ S aggregation and  $\alpha$ S( $\Delta$ 71–82) clustering on the integrity of SLBs, we systematically varied the concentration of  $\alpha$ S on SLBs. BODIPY-PC at 0.25 mol % was incorporated to visualize the SLBs. In the absence of protein, the bilayers were devoid of defects, cracks, or any other inhomogeneities resolvable by our confocal microscope (Fig. 2; Control). Upon adding increasing concentrations of WT- $\alpha$ S to separate SLBs, we observe a general loss of BODIPY-PC fluorescence intensity and appearance of defects with no lipid present (black regions in images) and patterns of elongated cracks with lower-than-average fluorescence intensities, suggesting damage to the SLBs (Fig. 2) after 18 h.

We observed that the extent of this damage seems to reduce as the protein concentration is reduced ( $P/L$  from 1 to 0.02) (see Fig. S3). In contrast to what was observed

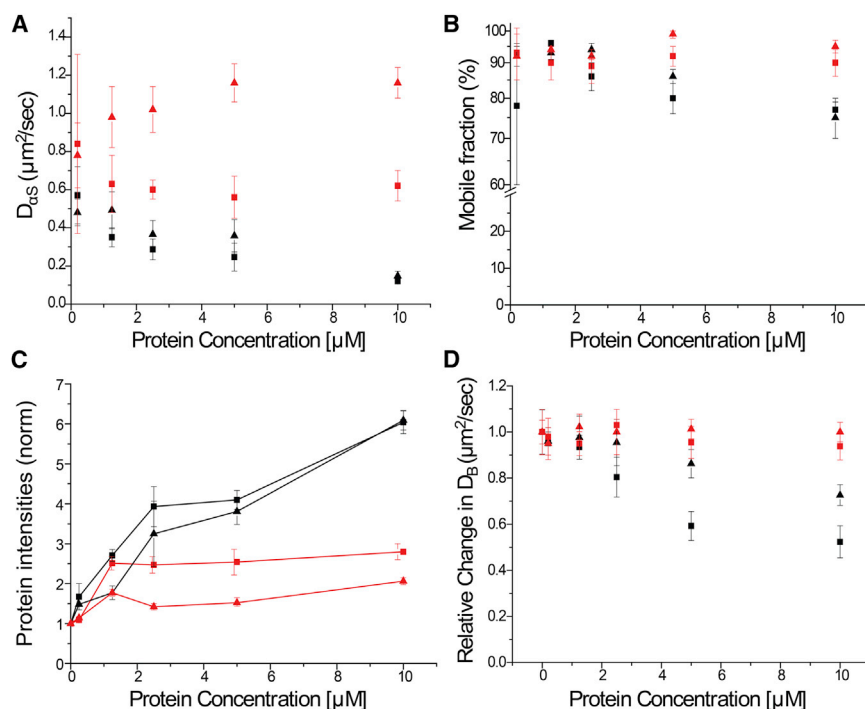

**FIGURE 6** Effects of adsorption of  $\alpha$ S on lipid and protein dynamics of the SLBs. In all the figures, measurements with WT- $\alpha$ S are shown (black symbols), and those with  $\alpha$ S( $\Delta$ 71–82) (red symbols); measurements on 50% POPG-containing membranes (square symbols) and those on 25% POPG-containing membranes (triangular symbols). (A) Apparent protein diffusion coefficients ( $D_{as}$ ). (B) Mobile fractions in protein channel obtained from FRAP upon incubation of  $\alpha$ S WT- $\alpha$ S and  $\alpha$ S( $\Delta$ 71–82) on POPC/POPG SLBs in increasing concentrations. (C) Average intensities (normalized to background of red channel) obtained from protein channels after 18 h incubation and removal of unbound protein. The WT- $\alpha$ S clearly shows a concentration-dependent rise in adsorbed protein irrespective of % of negative charge on SLBs, whereas  $\alpha$ S( $\Delta$ 71–82) intensities do not change with concentration. (D) Protein concentration-dependent changes in lateral diffusion coefficients of BODIPY-PC ( $D_B$ ) relative to that in the absence of protein. The error bars indicate standard deviation obtained from five independent measurements in panels A–C and from 10 independent measurements in panel D. All experiments were performed at room temperature in 50 mM HEPES, pH 7.4, 0.1 mM EDTA buffer. Note:

the protein diffusion measurements (B and C) at 200 nM had poor signal/background and therefore much poorer fits to the recovery curves and greater variability in both diffusion coefficient and mobile fractions estimates. To see this figure in color, go online.

with WT- $\alpha$ S, when  $\alpha$ S( $\Delta$ 71–82) is added to the SLBs, there was much less evidence of damage to SLBs (see Fig. S4). However,  $\alpha$ S( $\Delta$ 71–82) did form smaller clusters on the bilayer surface, as seen in Fig. 2. Control experiments involving SLBs incubated in buffer show no such damage over the timescale of the experiments. Moreover, these SLBs show negligible loss in BODIPY-PC fluorescence intensity over a period of at least 42 h. The onset of aggregation of WT- $\alpha$ S to form amyloid structures is faster with increasing composition of negatively charged lipids (12). Accordingly, to probe whether amyloid formation was involved in the observed membrane damage, we decreased the proportion of negative lipids. Upon incubation of 10  $\mu$ M protein on POPC/POPG (75:25) SLBs for 18 h, we found that WT- $\alpha$ S causes fewer and smaller defects, whereas  $\alpha$ S( $\Delta$ 71–82) mutants show almost no defect formation (see Fig. S5).

We measured the lipid fluorescence in the buffer solution above the SLBs before and after incubation with protein for 18 h. After protein incubation, there is a concentration dependent increase in lipid fluorescence. This increase is  $\sim$ 3–4-fold larger for WT- $\alpha$ S than for  $\alpha$ S( $\Delta$ 71–82) (see Fig. S7). These results suggest that the general loss of lipid fluorescence after incubation with WT- $\alpha$ S could be due to lipid extraction. We suggest that formation of amyloid structures in WT- $\alpha$ S occurs concurrently with extraction of lipids from the SLBs.

To test whether loss in membrane fluidity, membrane damage, and aggregate formation are influenced by the

BODIPY probe, SLBs containing a small fraction of NBD-PC lipids were incubated with 5  $\mu$ M and 10  $\mu$ M WT- $\alpha$ S. Similar defects, cracks in the lipid membrane, and protein aggregate formation were observed. We conclude that the specific fluorescent probe does not influence our observations. We find the same decrease in  $D_B$  upon incubation with unlabeled protein (5  $\mu$ M and 10  $\mu$ M WT- $\alpha$ S) rather than 25% labeled and 75% unlabeled protein, confirming that there is no significant effect on  $D_B$  from adding the fluorophores.

## DISCUSSION

WT- $\alpha$ S and  $\alpha$ S( $\Delta$ 71–82) behave differently on SLBs. Collectively, the data presented here shows that the adsorption of protein to the membrane surface results in protein clustering. Depending on the interactions between proteins, this clustering can result in the formation of amyloid, which causes significant perturbations in the bilayer structure and dynamics.

As the concentration of WT- $\alpha$ S is increased, the lipid structure is altered by formation of defects that appear to be devoid of lipid and by formation of a pattern of cracks with fewer lipids. Concurrently, the rate of diffusion of the lipid decreases, suggesting that diffusion is either hindered by the formation of cracks or slowed down by a strong association of lipid with protein clusters. As the concentration of  $\alpha$ S( $\Delta$ 71–82) mutant is increased, there are a few defects but there is no evidence of other perturbations to the lipid

membranes. We see no cracks and  $D_B$  is unaffected. There is also minimal loss of lipid. The perturbations by the WT- $\alpha$ S on the SLBs become more severe as the time of incubation is increased from 18 to 42 h. It is also important to note that there are no defects or lipid loss in samples without protein even after 42 h.

The effects of the WT- $\alpha$ S on the membrane fluidity and integrity are generally lipid-composition-dependent and more pronounced at high fractions of negatively charged lipids (POPG). Changing the composition of the lipid does not change the effects of the  $\alpha$ S( $\Delta$ 71–82) mutant on these membrane properties. Both WT- $\alpha$ S and  $\alpha$ S( $\Delta$ 71–82) are expected to adsorb on the membrane in comparable amounts owing to their comparable membrane binding. However, as the protein concentration is increased the amount of adsorbed WT- $\alpha$ S increases linearly, whereas there is no change in the amount of adsorbed  $\alpha$ S( $\Delta$ 71–82) mutant. Interestingly, the adsorption of the  $\alpha$ S( $\Delta$ 71–82) mutant is lower on membranes with lower proportion of charged lipids, whereas that of the WT- $\alpha$ S is not. This is consistent with the additional adsorption of the WT- $\alpha$ S arising from protein-protein binding rather than protein-lipid binding.

Both the WT- $\alpha$ S and  $\alpha$ S( $\Delta$ 71–82) mutant appear to form small clusters of protein on the surface. As the concentration increases, the average area of these clusters increase by approximately a factor of two. At all concentrations, the average cluster area of the WT- $\alpha$ S is larger on the highly charged membranes. This agrees with the earlier observations that at high protein/lipids, a high percentage of negative lipids increases the rate of aggregation of WT- $\alpha$ S (12). Moreover, WT- $\alpha$ S is seen to form very large clusters of protein at high concentrations and longer incubation times. These large clusters are stained positively by ThT, supporting the conclusion that the proteins in the clusters tend to aggregate into amyloid fibrils. Such large ThT positive structures are not observed for the deletion mutant. The largest amount of membrane damage occurs when amyloid structures form.

Therefore, the most likely explanation for the observed membrane damage would be the aggregation of WT- $\alpha$ S into amyloids characterized by a significant cross- $\beta$  sheet component on the membrane surface. The evidence for the extent of membrane damage is indirect, but support the conclusion that both lipid leaflets are removed because the fluorescence in these regions is reduced to background levels. In the cracks, the fluorescence is reduced, but not to the background levels, so these perturbations may be limited to the top leaflet. Defects in the SLBs are seen starting from  $P/L$  ratios of 1:10 and increase in frequency with higher concentrations. Vesicle permeabilization assays showed hardly any dye efflux with POPC/POPG large unilamellar vesicles (34), motivating us to test an alternative mechanism. Our data are consistent with a mechanism of membrane damage including lipid extraction and incorporation in amyloid structures.

Prior reports also suggest that  $\alpha$ S mutants having higher aggregation propensity cause significantly greater membrane damage in SLBs (24) or increased cell death of dopaminergic neurons in a rat model (46). Thus, aggregation into amyloids is likely to be the prerequisite for membrane damage. Previous studies on interaction of WT- $\alpha$ S with POPC/POPS (1:1) (17) and POPC/POPA (1:1) (12) supported lipid bilayers using atomic force microscopy also reveal defects and membrane disruption with formation of protein aggregates on the bilayer surface. Recent studies with model vesicles suggest a membrane thinning mechanism (47). WT- $\alpha$ S has previously been shown to cause phase separation and protein clustering to eggPG-rich domains (37,48) in eggPC/eggPG (50:50) SLBs. In our experiments, we do not observe phase separation upon addition of WT- $\alpha$ S; this may be attributed to the choice of lipids. Aggregate sizes similar to those observed for  $\alpha$ S have also been observed for  $\beta$ -amyloid (1–40) on POPC/POPG SLBs (49).

The rate of diffusion of the WT- $\alpha$ S is lower than that of the  $\alpha$ S( $\Delta$ 71–82) mutant at all concentrations and for both lipid compositions. Whereas the WT- $\alpha$ S diffusion decreases at higher concentrations, that of the  $\alpha$ S( $\Delta$ 71–82) mutant does not. Correspondingly, the fraction of mobile WT- $\alpha$ S decreases at high concentrations whereas the  $\alpha$ S( $\Delta$ 71–82) mutant remains fully mobile. The decrease in mobile fraction of WT- $\alpha$ S is consistent with the formation of large amyloid aggregates and to the change in the lipid diffusion, suggesting a correlation between the two effects.

The diffusivity of the WT- $\alpha$ S is independent of the lipid composition of the SLBs. However, the  $\alpha$ S( $\Delta$ 71–82) mutant moves significantly faster on the less charged membrane. This may be related to the observation that there is less protein adsorbed, which would suggest that the protein diffusion is sensitive to protein concentration on the surface. Because there appears to be no difference in the average cluster area for the  $\alpha$ S( $\Delta$ 71–82) mutant on two differently charged membranes, the difference in protein diffusion is not related to the cluster sizes.

If the changes in lipid and protein diffusion are linked, it could arise from direct protein-lipid bilayer interactions. This notion is supported by the observation that the large aggregates colocalize with lipids. The diffusion of the lipid  $D_B$  is therefore retarded by the diffusion of the protein  $D_{\alpha S}$  in proportion to the amount bound to the protein as

$$D_B = f_a D_{\alpha S} + (1 - f_a) D_f, \quad (3)$$

where  $D_f$  is the measured diffusion coefficient of BODIPY-PC in absence of any protein and  $f_a$  is the fraction of lipid bound. This relation assumes a rapid exchange between free and bound lipid on the timescale of the recovery of fluorescence (minutes). Table 1 shows the calculated fractions ( $f_a$ ) as a function of protein concentration. The value  $f_a$  increases with protein concentration and with the fraction of negatively-charged lipids in the SLBs in a self-consistent

**TABLE 1 Cluster-associated fractions of BODIPY-PC on POPC/POPG SLB**

|                                                          | Protein concentration ( $\mu\text{M}$ ) | Measured $D_B$ ( $\mu\text{m}^2/\text{s}$ ) | Measured $D_{\alpha\text{S}}$ ( $\mu\text{m}^2/\text{s}$ ) | $f_a$ (from model) |
|----------------------------------------------------------|-----------------------------------------|---------------------------------------------|------------------------------------------------------------|--------------------|
| WT- $\alpha\text{S}$ on POPC/POPG (50:50) SLBs           | 10                                      | $0.75 \pm 0.07$                             | $0.15 \pm 0.02$                                            | $0.39 \pm 0.06$    |
|                                                          | 5                                       | $0.81 \pm 0.06$                             | $0.36 \pm 0.09$                                            | $0.42 \pm 0.06$    |
|                                                          | 2.5                                     | $0.87 \pm 0.09$                             | $0.37 \pm 0.07$                                            | $0.33 \pm 0.07$    |
|                                                          | 1.25                                    | $1.08 \pm 0.05$                             | $0.49 \pm 0.10$                                            | $0.11 \pm 0.04$    |
|                                                          | 0.20                                    | $1.14 \pm 0.03$                             | $0.48 \pm 0.07$                                            | $0.05 \pm 0.03$    |
| WT- $\alpha\text{S}$ on POPC/POPG (75:25) SLBs           | 10                                      | $0.84 \pm 0.04$                             | $0.12 \pm 0.01$                                            | $0.31 \pm 0.02$    |
|                                                          | 5                                       | $1.04 \pm 0.06$                             | $0.25 \pm 0.07$                                            | $0.18 \pm 0.03$    |
|                                                          | 2.5                                     | $1.10 \pm 0.10$                             | $0.29 \pm 0.05$                                            | $0.12 \pm 0.04$    |
|                                                          | 1.25                                    | $1.08 \pm 0.09$                             | $0.35 \pm 0.05$                                            | $0.09 \pm 0.04$    |
|                                                          | 0.20                                    | $0.97 \pm 0.06$                             | $0.57 \pm 0.15$                                            | $0.14 \pm 0.11$    |
| $\alpha\text{S}(\Delta 71-82)$ on POPC/POPG (50:50) SLBs | 10                                      | $1.05 \pm 0.04$                             | $0.62 \pm 0.08$                                            | $0.05 \pm 0.03$    |
|                                                          | 5                                       | $1.02 \pm 0.04$                             | $0.56 \pm 0.11$                                            | $0.06 \pm 0.02$    |
|                                                          | 2.5                                     | $1.13 \pm 0.09$                             | $0.60 \pm 0.05$                                            | $0.04 \pm 0.01$    |
|                                                          | 1.25                                    | $1.04 \pm 0.05$                             | $0.63 \pm 0.15$                                            | $0.04 \pm 0.02$    |
|                                                          | 0.20                                    | $1.02 \pm 0.07$                             | $0.84 \pm 0.47$                                            | $0.10 \pm 0.05$    |
| $\alpha\text{S}(\Delta 71-82)$ on POPC/POPG (75:25) SLBs | 10                                      | $1.21 \pm 0.06$                             | $1.16 \pm 0.08$                                            | $0.08 \pm 0.03$    |
|                                                          | 5                                       | $1.21 \pm 0.07$                             | $1.16 \pm 0.10$                                            | $0.08 \pm 0.05$    |
|                                                          | 2.5                                     | $1.49 \pm 0.02$                             | $1.02 \pm 0.12$                                            | $0.04 \pm 0.01$    |
|                                                          | 1.25                                    | $1.42 \pm 0.05$                             | $0.98 \pm 0.16$                                            | $0.03 \pm 0.02$    |
|                                                          | 0.20                                    | $1.09 \pm 0.08$                             | $0.78 \pm 0.17$                                            | $0.06 \pm 0.04$    |

Clusters associated with fraction  $f_a$  obtained from Eq. 3. This fraction increases with the protein concentration and fraction of negative lipids. Note: the protein diffusion measurements at 200 nM had poor signal/background and therefore much poorer fits to the recovery curves and greater variability in both diffusion coefficients ( $D_{\alpha\text{S}}$ ) and mobile fractions estimates. The error bars indicate standard deviations from five independent measurements.

manner. Although BODIPY-PC exhibits reduced lateral mobility upon incubation with WT- $\alpha\text{S}$ , its mobile fraction remains close to unity at all protein concentrations used. This suggests that BODIPY-PC is not immobilized beneath or around the clusters. Thus, the lipids in the SLBs must be able to exchange within the timescale of the measurement of fluorescence recovery.

### A model for aggregation of $\alpha\text{S}$ on SLBs

Our operating model for the action of  $\alpha\text{S}$  on SLBs is illustrated in Fig. 7. Alpha-synuclein initially binds the charged lipids in the membranes via a conformational change that involves the formation of amphipathic  $\alpha$ -helical structures.

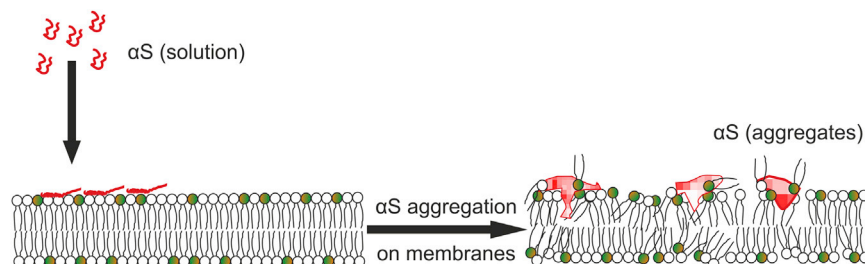

**FIGURE 7** Model for lipid membrane disruption by  $\alpha$ -synuclein. To see this figure in color, go online.

These adsorbed proteins interact to form small clusters that are the end points for the self-assembly of the  $\alpha\text{S}(\Delta 71-82)$  mutant. However, in the WT- $\alpha\text{S}$ , clustering is followed by aggregation allowing additional adsorption of the protein, and leading to amyloid-containing protein aggregates. These aggregates bind strongly to negatively-charged lipids (POPG), thereby reducing the effective mobility of the lipid mixture. The clusters weakly associate with POPC because the mobile fraction of BODIPY-PC is unchanged. If the protein aggregate detaches from the membrane, it would lead to lipid loss.

## CONCLUSIONS

We report that aggregation of WT- $\alpha\text{S}$  on lipid membranes leads to formation of amyloid structures that grow in time. This conversion of monomeric WT- $\alpha\text{S}$  to amyloid structures composed of lipids and WT- $\alpha\text{S}$  is accompanied by significant membrane damage, lipid extraction, and reduced lateral mobility of lipids in SLBs. This happens more prominently at high protein to lipid ratios. The  $\alpha\text{S}(\Delta 71-82)$  mutant fails to form amyloids on the bilayer surface and thus is not able to damage lipid membranes. Overall, our data suggests that aggregation of WT- $\alpha\text{S}$  on lipid membranes affects membrane integrity. Whether the membrane damage observed in our experiments arises from a distinct amyloid species or the process of amyloid formation remains to be established.

## SUPPORTING MATERIAL

Seven figures and one table are available at [http://www.biophysj.org/biophysj/supplemental/S0006-3495\(14\)00463-9](http://www.biophysj.org/biophysj/supplemental/S0006-3495(14)00463-9).

The authors thank Professor Benoit I. Giasson from the University of Florida for providing the plasmids for the  $\alpha\text{S}(\Delta 71-82)$  synuclein construct, Kapil Dev Singh from University of Zürich for providing a script for data analysis, and Nathalie Schilderink from the University of Twente for assistance with  $\alpha\text{S}$  expression, purification, and labeling.

This work was performed in the program entitled "A Single Molecule View on Protein Aggregation", part of the research program of the Foundation for Fundamental Research on Matter (FOM), which is part of the Netherlands Organization for Scientific Research (NWO). N.O.P.'s visit to the Netherlands was supported by visitors travel grant No. 040-11-389 from the Netherlands Organization for Scientific Research.



## REFERENCES

- Spillantini, M. G., M. L. Schmidt, ..., M. Goedert. 1997. Alpha-synuclein in Lewy bodies. *Nature*. 388:839–840.
- Fiskum, G., A. Starkov, ..., C. Chinopoulos. 2003. Mitochondrial mechanisms of neural cell death and neuroprotective interventions in Parkinson's disease. *Ann. N. Y. Acad. Sci.* 991:111–119.
- Polymeropoulos, M. H., C. Lavedan, ..., R. L. Nussbaum. 1997. Mutation in the  $\alpha$ -synuclein gene identified in families with Parkinson's disease. *Science*. 276:2045–2047.
- Nemani, V. M., W. Lu, ..., R. H. Edwards. 2010. Increased expression of  $\alpha$ -synuclein reduces neurotransmitter release by inhibiting synaptic vesicle reclustering after endocytosis. *Neuron*. 65:66–79.
- Farrer, M. J. 2006. Genetics of Parkinson disease: paradigm shifts and future prospects. *Nat. Rev. Genet.* 7:306–318.
- Gai, W. P., H. X. Yuan, ..., P. H. Jensen. 2000. In situ and in vitro study of colocalization and segregation of alpha-synuclein, ubiquitin, and lipids in Lewy bodies. *Exp. Neurol.* 166:324–333.
- van Raaij, M. E., J. van Gestel, ..., V. Subramaniam. 2008. Concentration dependence of  $\alpha$ -synuclein fibril length assessed by quantitative atomic force microscopy and statistical-mechanical theory. *Biophys. J.* 95:4871–4878.
- Hoyer, W., T. Antony, ..., V. Subramaniam. 2002. Dependence of  $\alpha$ -synuclein aggregate morphology on solution conditions. *J. Mol. Biol.* 322:383–393.
- Munishkina, L. A., J. Henriques, ..., A. L. Fink. 2004. Role of protein-water interactions and electrostatics in  $\alpha$ -synuclein fibril formation. *Biochemistry*. 43:3289–3300.
- Burke, K. A., E. A. Yates, and J. Legleiter. 2013. Biophysical insights into how surfaces, including lipid membranes, modulate protein aggregation related to neurodegeneration. *Frontiers Neurol.* 4:17.
- Hellstrand, E., M. Grey, ..., E. Sparr. 2013. Adsorption of  $\alpha$ -synuclein to supported lipid bilayers: positioning and role of electrostatics. *ACS Chem. Neurosci.* 4:1339–1351.
- Zhu, M., J. Li, and A. L. Fink. 2003. The association of  $\alpha$ -synuclein with membranes affects bilayer structure, stability, and fibril formation. *J. Biol. Chem.* 278:40186–40197.
- Necula, M., C. N. Chirita, and J. Kuret. 2003. Rapid anionic micelle-mediated  $\alpha$ -synuclein fibrillization in vitro. *J. Biol. Chem.* 278:46674–46680.
- Goers, J., V. N. Uversky, and A. L. Fink. 2003. Polycation-induced oligomerization and accelerated fibrillation of human  $\alpha$ -synuclein in vitro. *Protein Sci.* 12:702–707.
- Lorenzen, N., L. Lemminger, ..., D. E. Otzen. 2014. The N-terminus of  $\alpha$ -synuclein is essential for both monomeric and oligomeric interactions with membranes. *FEBS Lett.* 588:497–502.
- Davidson, W. S., A. Jonas, ..., J. M. George. 1998. Stabilization of  $\alpha$ -synuclein secondary structure upon binding to synthetic membranes. *J. Biol. Chem.* 273:9443–9449.
- Jo, E., J. McLaurin, ..., P. E. Fraser. 2000.  $\alpha$ -Synuclein membrane interactions and lipid specificity. *J. Biol. Chem.* 275:34328–34334.
- Domanov, Y. A., and P. K. Kinnunen. 2008. Islet amyloid polypeptide forms rigid lipid-protein amyloid fibrils on supported phospholipid bilayers. *J. Mol. Biol.* 376:42–54.
- Sasahara, K., K. Morigaki, ..., D. Hamada. 2012. Binding of islet amyloid polypeptide to supported lipid bilayers and amyloid aggregation at the membranes. *Biochemistry*. 51:6908–6919.
- Pifer, P. M., E. A. Yates, and J. Legleiter. 2011. Point mutations in A $\beta$  result in the formation of distinct polymorphic aggregates in the presence of lipid bilayers. *PLoS ONE*. 6:e16248.
- Hane, F., E. Drolle, ..., Z. Leonenko. 2011. Amyloid- $\beta$  aggregation on model lipid membranes: an atomic force microscopy study. *J. Alzheimers Dis.* 26:485–494.
- Last, N. B., E. Rhoades, and A. D. Miranker. 2011. Islet amyloid polypeptide demonstrates a persistent capacity to disrupt membrane integrity. *Proc. Natl. Acad. Sci. USA*. 108:9460–9465.
- Khemtmourian, L., E. Doménech, ..., J. A. Killian. 2011. Low pH acts as inhibitor of membrane damage induced by human islet amyloid polypeptide. *J. Am. Chem. Soc.* 133:15598–15604.
- Reynolds, N. P., A. Soragni, ..., S. Seeger. 2011. Mechanism of membrane interaction and disruption by  $\alpha$ -synuclein. *J. Am. Chem. Soc.* 133:19366–19375.
- Ouberaï, M. M., J. Wang, ..., M. E. Welland. 2013.  $\alpha$ -Synuclein senses lipid packing defects and induces lateral expansion of lipids leading to membrane remodeling. *J. Biol. Chem.* 288:20883–20895.
- Rabe, M., A. Soragni, ..., S. Seeger. 2013. On-surface aggregation of  $\alpha$ -synuclein at nanomolar concentrations results in two distinct growth mechanisms. *ACS Chem. Neurosci.* 4:408–417.
- Hellstrand, E., A. Nowacka, ..., E. Sparr. 2013. Membrane lipid co-aggregation with  $\alpha$ -synuclein fibrils. *PLoS ONE*. 8:e77235.
- Lashuel, H. A., D. Hartley, ..., P. T. Lansbury, Jr. 2002. Neurodegenerative disease: amyloid pores from pathogenic mutations. *Nature*. 418:291.
- Hashimoto, M., E. Rockenstein, ..., E. Masliah. 2003. Role of protein aggregation in mitochondrial dysfunction and neurodegeneration in Alzheimer's and Parkinson's diseases. *Neuromolecular Med.* 4:21–36.
- Pacheco, C., L. G. Aguayo, and C. Opazo. 2012. An extracellular mechanism that can explain the neurotoxic effects of  $\alpha$ -synuclein aggregates in the brain. *Frontiers Physiol.* 3:297.
- Lorenzen, N., S. B. Nielsen, ..., D. E. Otzen. 2014. The role of stable  $\alpha$ -synuclein oligomers in the molecular events underlying amyloid formation. *J. Am. Chem. Soc.* 136:3859–3868.
- Stöckl, M. T., M. M. A. E. Claessens, and V. Subramaniam. 2012. Kinetic measurements give new insights into lipid membrane permeabilization by  $\alpha$ -synuclein oligomers. *Mol. Biosyst.* 8:338–345.
- van Rooijen, B. D., M. M. A. E. Claessens, and V. Subramaniam. 2010. Membrane permeabilization by oligomeric  $\alpha$ -synuclein: in search of the mechanism. *PLoS ONE*. 5:e14292.
- van Rooijen, B. D., M. M. A. E. Claessens, and V. Subramaniam. 2009. Lipid bilayer disruption by oligomeric  $\alpha$ -synuclein depends on bilayer charge and accessibility of the hydrophobic core. *Biochim. Biophys. Acta*. 1788:1271–1278.
- Quist, A., I. Doudevski, ..., R. Lal. 2005. Amyloid ion channels: a common structural link for protein-misfolding disease. *Proc. Natl. Acad. Sci. USA*. 102:10427–10432.
- Giasson, B. I., I. V. Murray, ..., V. M. Lee. 2001. A hydrophobic stretch of 12 amino acid residues in the middle of  $\alpha$ -synuclein is essential for filament assembly. *J. Biol. Chem.* 276:2380–2386.
- Pandey, A. P., F. Haque, ..., J. S. Hovis. 2009. Clustering of  $\alpha$ -synuclein on supported lipid bilayers: role of anionic lipid, protein, and divalent ion concentration. *Biophys. J.* 96:540–551.
- van Raaij, M. E., I. M. Segers-Nolten, and V. Subramaniam. 2006. Quantitative morphological analysis reveals ultrastructural diversity of amyloid fibrils from  $\alpha$ -synuclein mutants. *Biophys. J.* 91:L96–L98.
- Armstrong, R. A. 2007. Size frequency distributions of abnormal protein deposits in Alzheimer's disease and variant Creutzfeldt-Jakob disease. *Folia Neuropathol.* 45:108–114.
- Soumpasis, D. M. 1983. Theoretical analysis of fluorescence photobleaching recovery experiments. *Biophys. J.* 41:95–97.
- Seu, K. J., L. R. Cambrea, ..., J. S. Hovis. 2006. Influence of lipid chemistry on membrane fluidity: tail and headgroup interactions. *Biophys. J.* 91:3727–3735.
- Shvadchak, V. V., L. J. Falomir-Lockhart, ..., T. M. Jovin. 2011. Specificity and kinetics of  $\alpha$ -synuclein binding to model membranes determined with fluorescent excited state intramolecular proton transfer (ESIPT) probe. *J. Biol. Chem.* 286:13023–13032.
- Waxman, E. A., J. R. Mazzulli, and B. I. Giasson. 2009. Characterization of hydrophobic residue requirements for  $\alpha$ -synuclein fibrillization. *Biochemistry*. 48:9427–9436.

44. Hovis, J. S., and S. G. Boxer. 2001. Patterning and composition arrays of supported lipid bilayers by microcontact printing. *Langmuir*. 17:3400–3405.
45. Murray, D. H., L. K. Tamm, and V. Kiessling. 2009. Supported double membranes. *J. Struct. Biol.* 168:183–189.
46. Winner, B., R. Jappelli, ..., R. Riek. 2011. In vivo demonstration that alpha-synuclein oligomers are toxic. *Proc. Natl. Acad. Sci. USA*. 108:4194–4199.
47. Braun, A. R., E. Sevcik, ..., J. N. Sachs. 2012.  $\alpha$ -Synuclein induces both positive mean curvature and negative Gaussian curvature in membranes. *J. Am. Chem. Soc.* 134:2613–2620.
48. Pandey, A. P., F. Haque, ..., J. S. Hovis. 2011.  $\alpha$ -Synuclein-induced tubule formation in lipid bilayers. *J. Phys. Chem. B*. 115:5886–5893.
49. Ding, H., J. A. Schauerte, ..., A. Gafni. 2012.  $\beta$ -Amyloid (1–40) peptide interactions with supported phospholipid membranes: a single-molecule study. *Biophys. J.* 103:1500–1509.

1  
2  
3  
4  
5  
6  
7  
8  
9  
10  
11  
12

## Supporting Material

### **Amyloids of alpha synuclein affect the structure and dynamics of supported lipid bilayers**

Aditya Iyer<sup>†‡</sup>, Nils O. Petersen<sup>‡§</sup>, Mireille M.A.E Claessens<sup>‡</sup> and Vinod Subramaniam<sup>†‡\*</sup>

<sup>†</sup>Nanoscale Biophysics Group, FOM Institute AMOLF, Amsterdam, The Netherlands.

<sup>‡</sup>Nanobiophysics Group, MESA+ Institute for Nanotechnology,

University of Twente, Enschede, The Netherlands.

<sup>§</sup>Department of Chemistry, University of Alberta, Edmonton, Canada.

## Table of Contents

|    |                                                                                                                  |
|----|------------------------------------------------------------------------------------------------------------------|
| 1  |                                                                                                                  |
| 2  |                                                                                                                  |
| 3  | 1. Fig S1: Optimizing thresholding parameters for cluster analysis.                                              |
| 4  | 2. Fig S2: Aggregation kinetics of $\alpha$ S variants at 37°C monitored by ThT fluorescence.                    |
| 5  | 3. Fig S3: Adsorption of WT- $\alpha$ S on POPC:POPG (50:50) SLBs.                                               |
| 6  | 4. Fig S4: Adsorption of $\alpha$ S( $\Delta$ 71-82) on POPC:POPG (50:50) SLBs.                                  |
| 7  | 5. Fig S5: Adsorption of $\alpha$ S on POPC : POPG (75:25) SLBs.                                                 |
| 8  | 6. Fig S6: Aggregate area histograms of WT- $\alpha$ S and $\alpha$ S( $\Delta$ 71-82) formed on POPC:POPG SLBs. |
| 9  | 7. Fig S7: Lipid fluorescence in buffer above SLBs after $\alpha$ S incubation on POPC:POPG SLBs.                |
| 10 | 8. Table S1: Cluster sizes of $\alpha$ S on POPC: POPG supported lipid bilayers.                                 |
| 11 |                                                                                                                  |

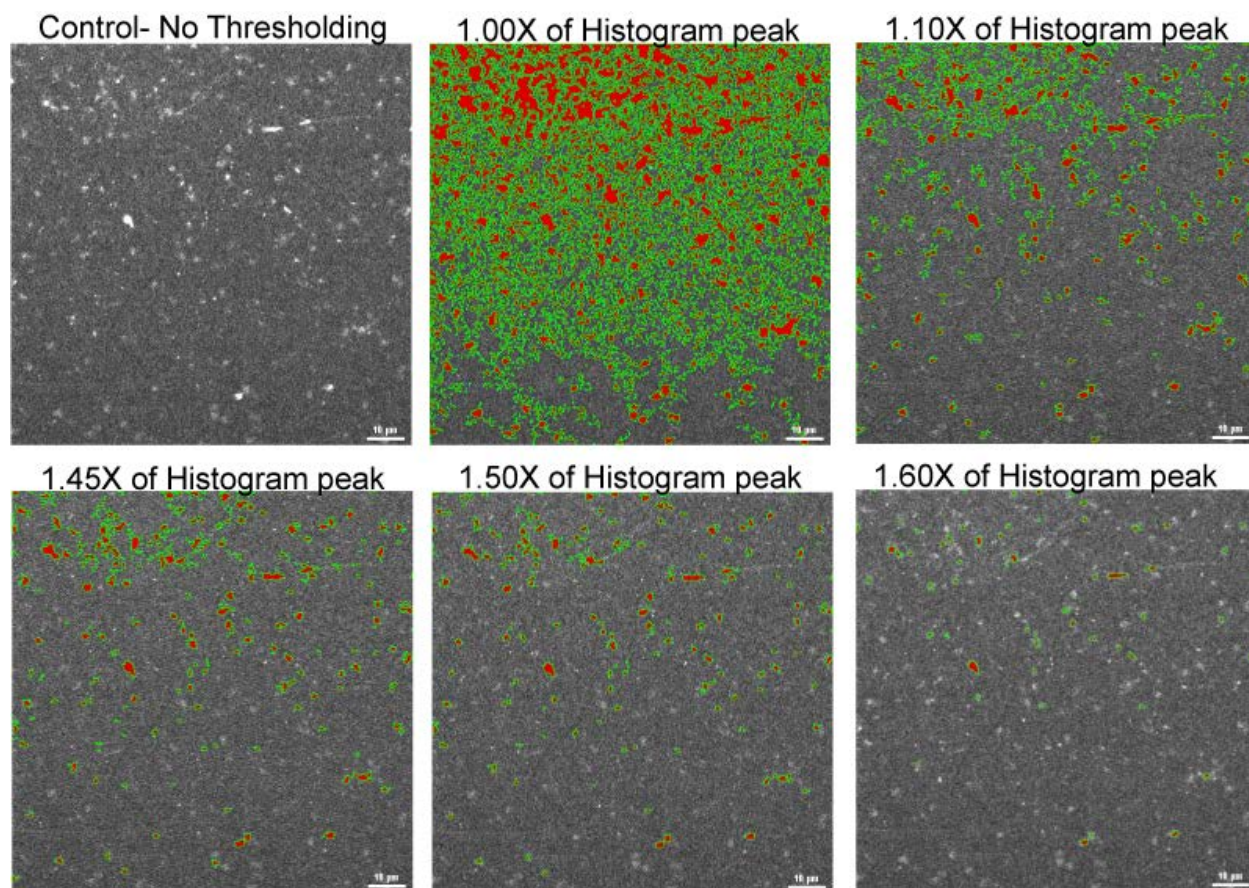

1

2 **Fig S1: Optimizing thresholding parameters for cluster analysis.** Using the Nikon NIS  
 3 Elements software, the *ObjectCount* plugin was used to set an intensity threshold. To choose an  
 4 optimum threshold, the thresholding point was varied along the intensity histogram in the protein  
 5 channel. As seen in the figure, a thresholding value of 1.60X leads to exclusion of certain  
 6 aggregates and a value up to 1.45X leads to over-estimation of cluster sizes. Thus 1.50X was  
 7 chosen as a thresholding value for all images. All images were taken at room temperature in 50  
 8 mM HEPES, 0.1 mM EDTA, pH 7.4 buffer.

9

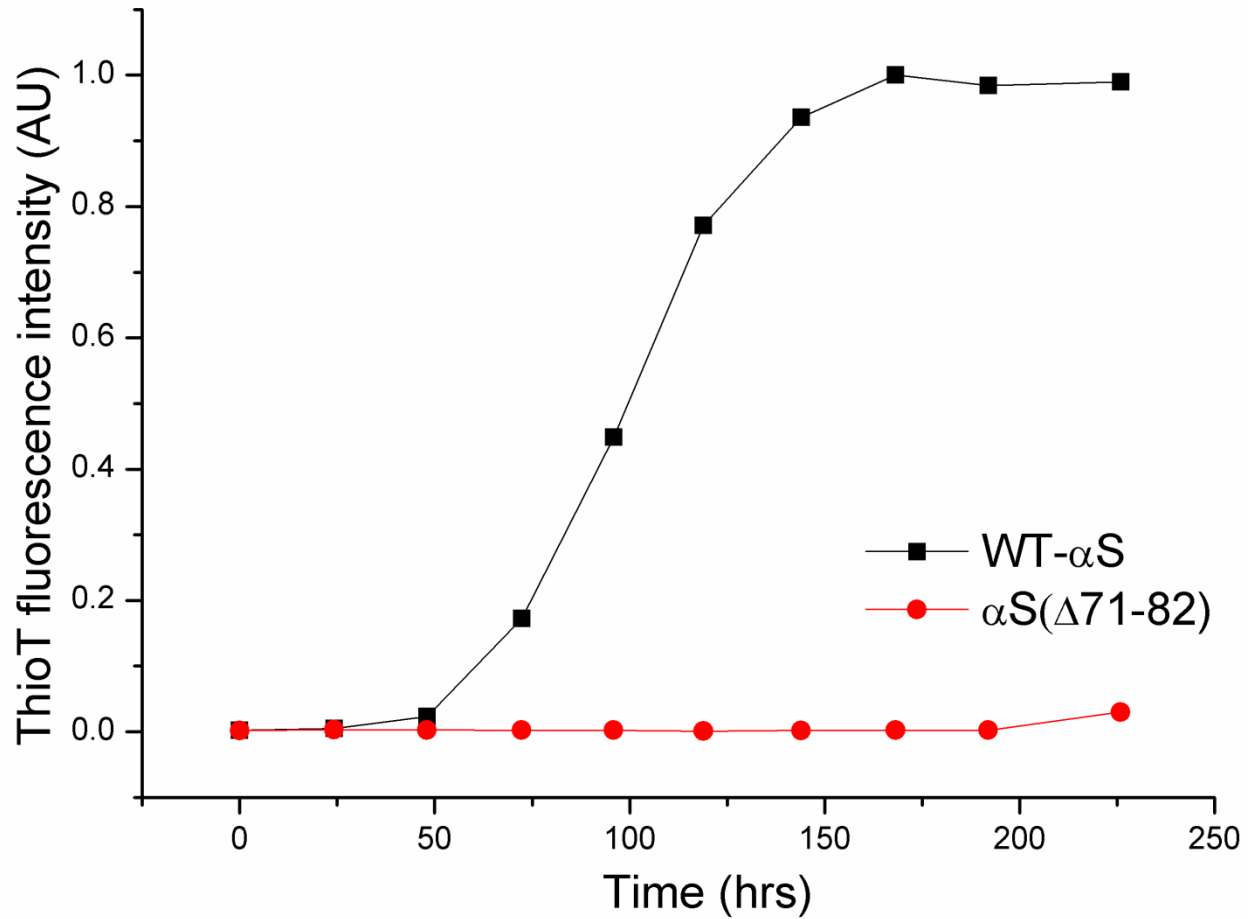

1

2 **Fig S2: Aggregation kinetics of  $\alpha$ S variants at 37°C monitored by ThT fluorescence.**

3 The aggregation reaction was carried out using 50 mM HEPES, 0.1 mM EDTA at 300rpm  
4 constant orbital shaking conditions in a fluorescence microplate reader. The protein  
5 concentration was kept at 100  $\mu$ M and the ThT concentration was 10  $\mu$ M.

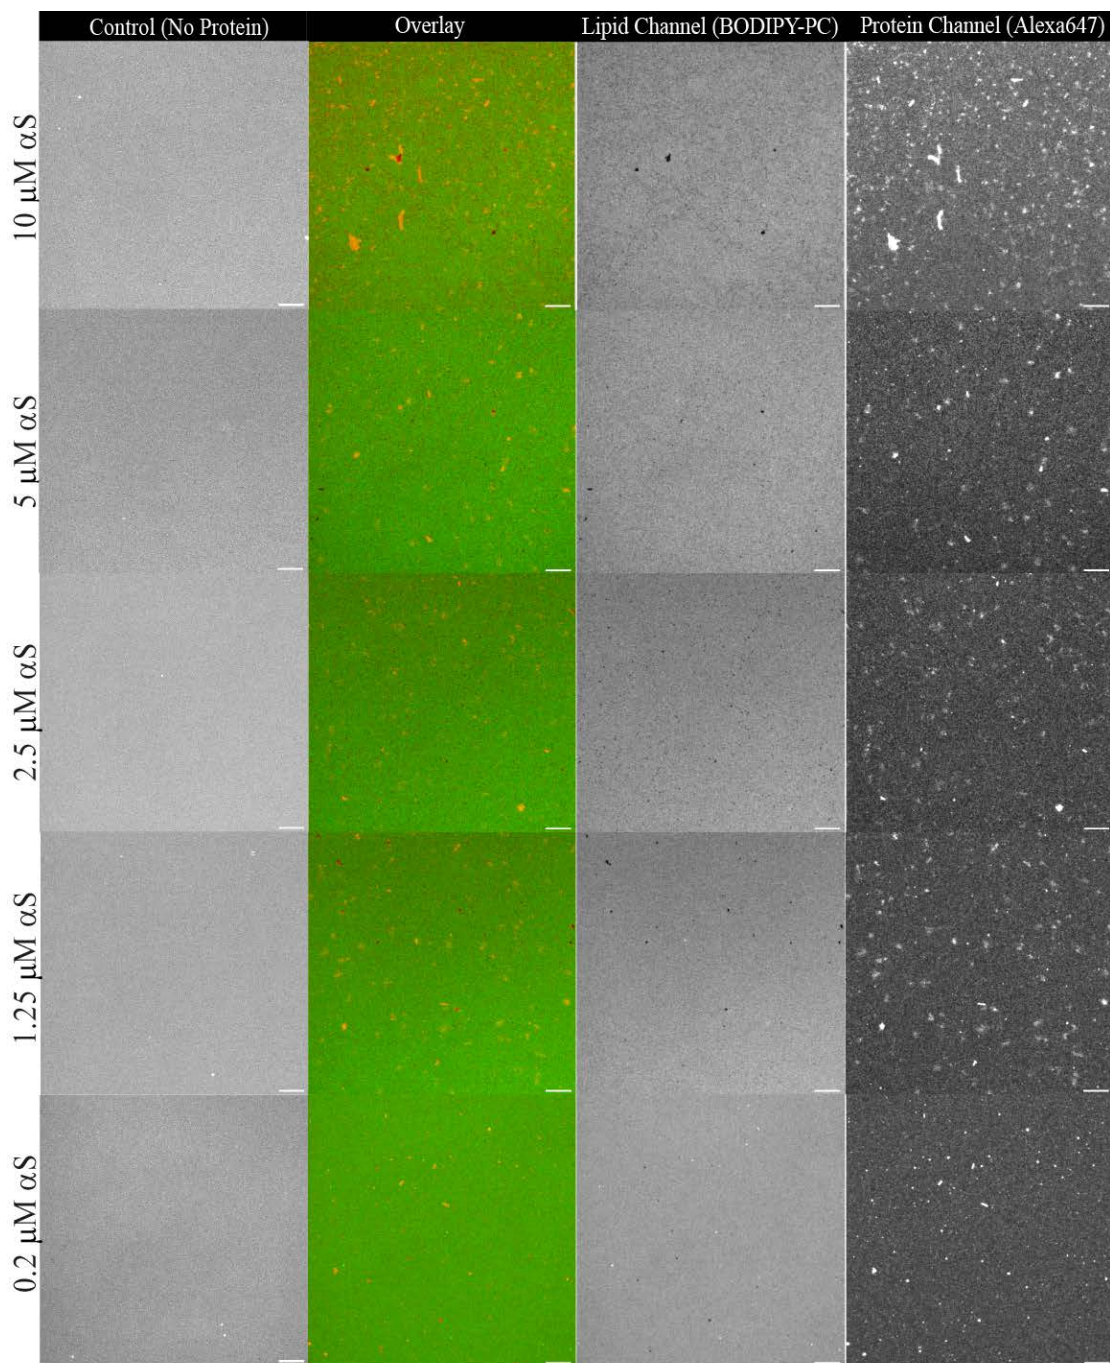

1

2 **Fig S3: Adsorption of WT- $\alpha$ S on POPC:POPG (50:50) SLBs.** Representative confocal  
3 images of SLBs before (control) and after addition of increasing amounts of WT- $\alpha$ S (labeled to  
4 AlexaFluor 647). 0.25 mol% of BODIPY-PC was incorporated as a fluorescent lipid probe in  
5 SLBs. The lipid channel clearly shows increasing membrane damage in form of defects and  
6 cracks as the protein concentration is increased from 0.2  $\mu$ M WT- $\alpha$ S to 10  $\mu$ M WT- $\alpha$ S.  
7 Correspondingly the cluster sizes also seem to increase upon increasing protein concentration.  
8 Images are contrasted to the same extent to facilitate proper comparison. All images were taken  
9 at room temperature in 50 mM HEPES, 0.1 mM EDTA, pH 7.4 buffer. The scale bar is 10  $\mu$ m.

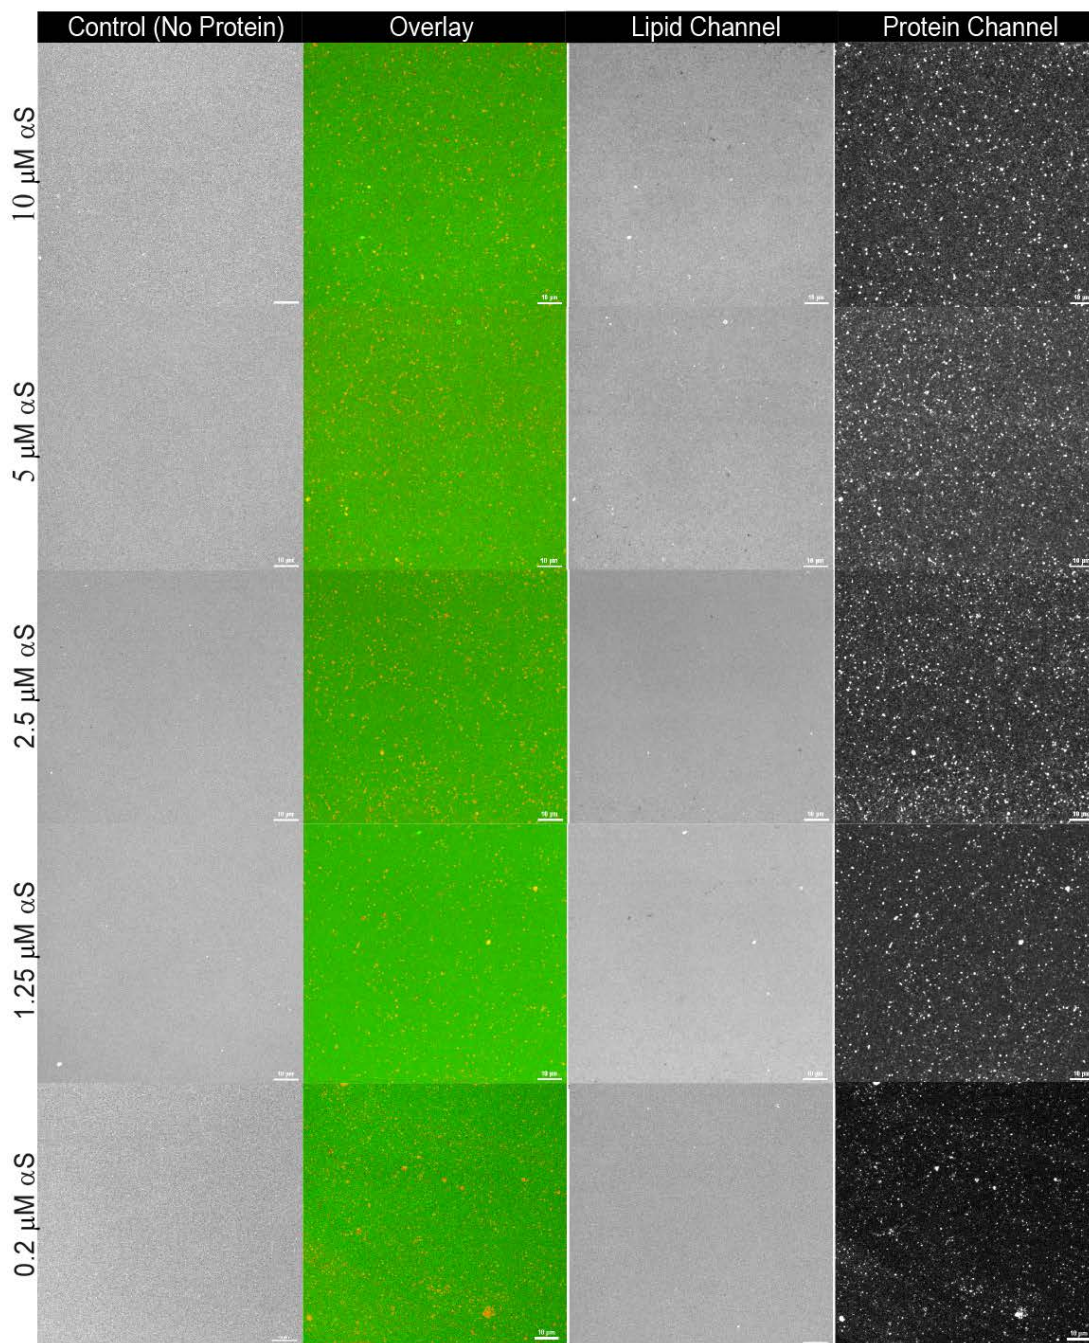

1

2 **Fig S4: Adsorption of  $\alpha$ S( $\Delta$ 71-82) on POPC:POPG (50:50) SLBs.** Representative confocal  
3 images of SLBs before (control) and after addition of increasing amounts of  $\alpha$ S( $\Delta$ 71-82) mutant  
4 which was labeled to AlexaFluor 647. 0.25 mol% of BODIPY-PC was incorporated as a  
5 fluorescent lipid probe in SLBs. The above images show clearly no effect of incubation of  
6  $\alpha$ S( $\Delta$ 71-82) as the concentration is increased from 0.20  $\mu$ M to 10  $\mu$ M. There is hardly any  
7 significant damage seen across this concentration range. Correspondingly the cluster sizes also  
8 do not show a difference. Images are contrasted to the same extent to facilitate proper  
9 comparison. All images were taken at room temperature in 50 mM HEPES, 0.1 mM EDTA, pH  
10 7.4 buffer. The scale bar is 10  $\mu$ m.



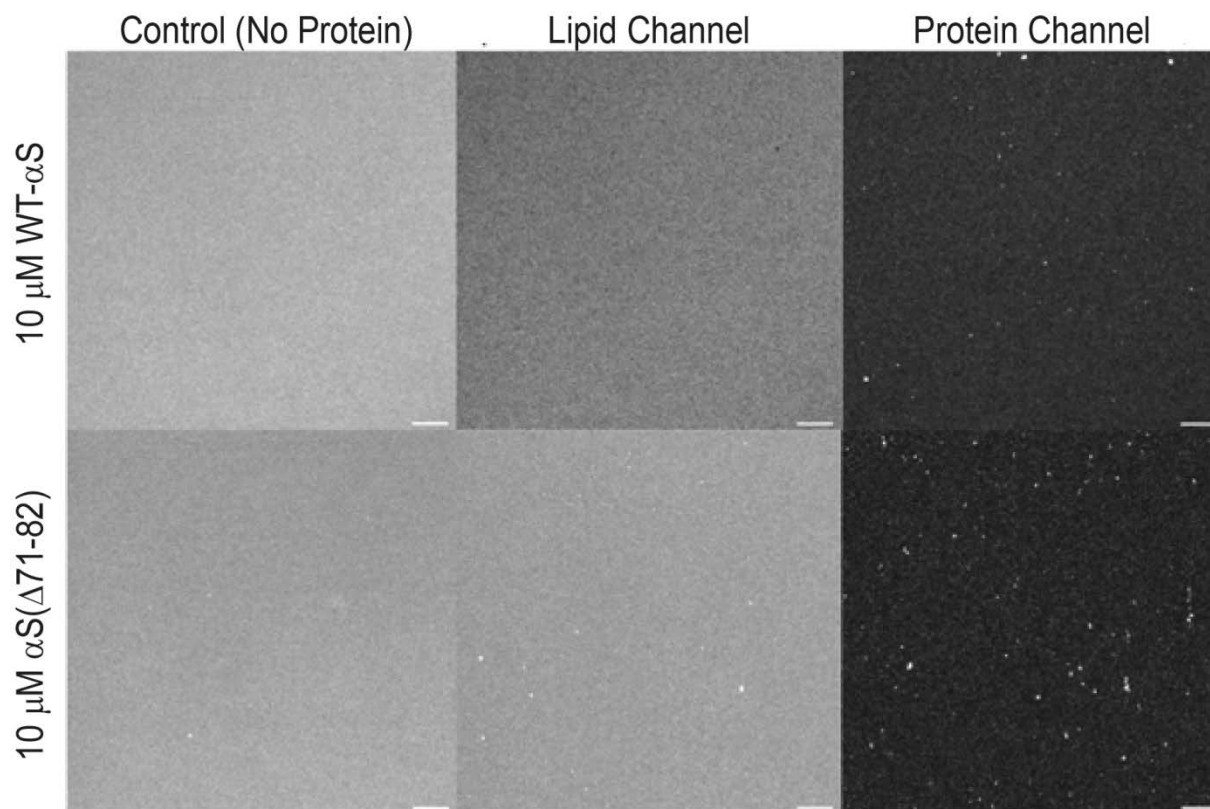

1

2 **Fig S5: Adsorption of  $\alpha$ S on POPC : POPG (75:25) SLBs.** Representative images of adsorption of 10  
3  $\mu$ M  $\alpha$ S after an 18 hour incubation period. The lipid channel shows very small defects and fluorescence  
4 intensity loss with the WT- $\alpha$ S (top panels), whereas no such effects are seen with  $\alpha$ S( $\Delta$ 71-82) (lower  
5 panels). Images are contrasted to the same extent to facilitate proper comparison. All experiments were  
6 performed at room temperature in 50 mM HEPES, pH 7.4, 0.1 mM EDTA buffer. The scale bar is 10  $\mu$ m.

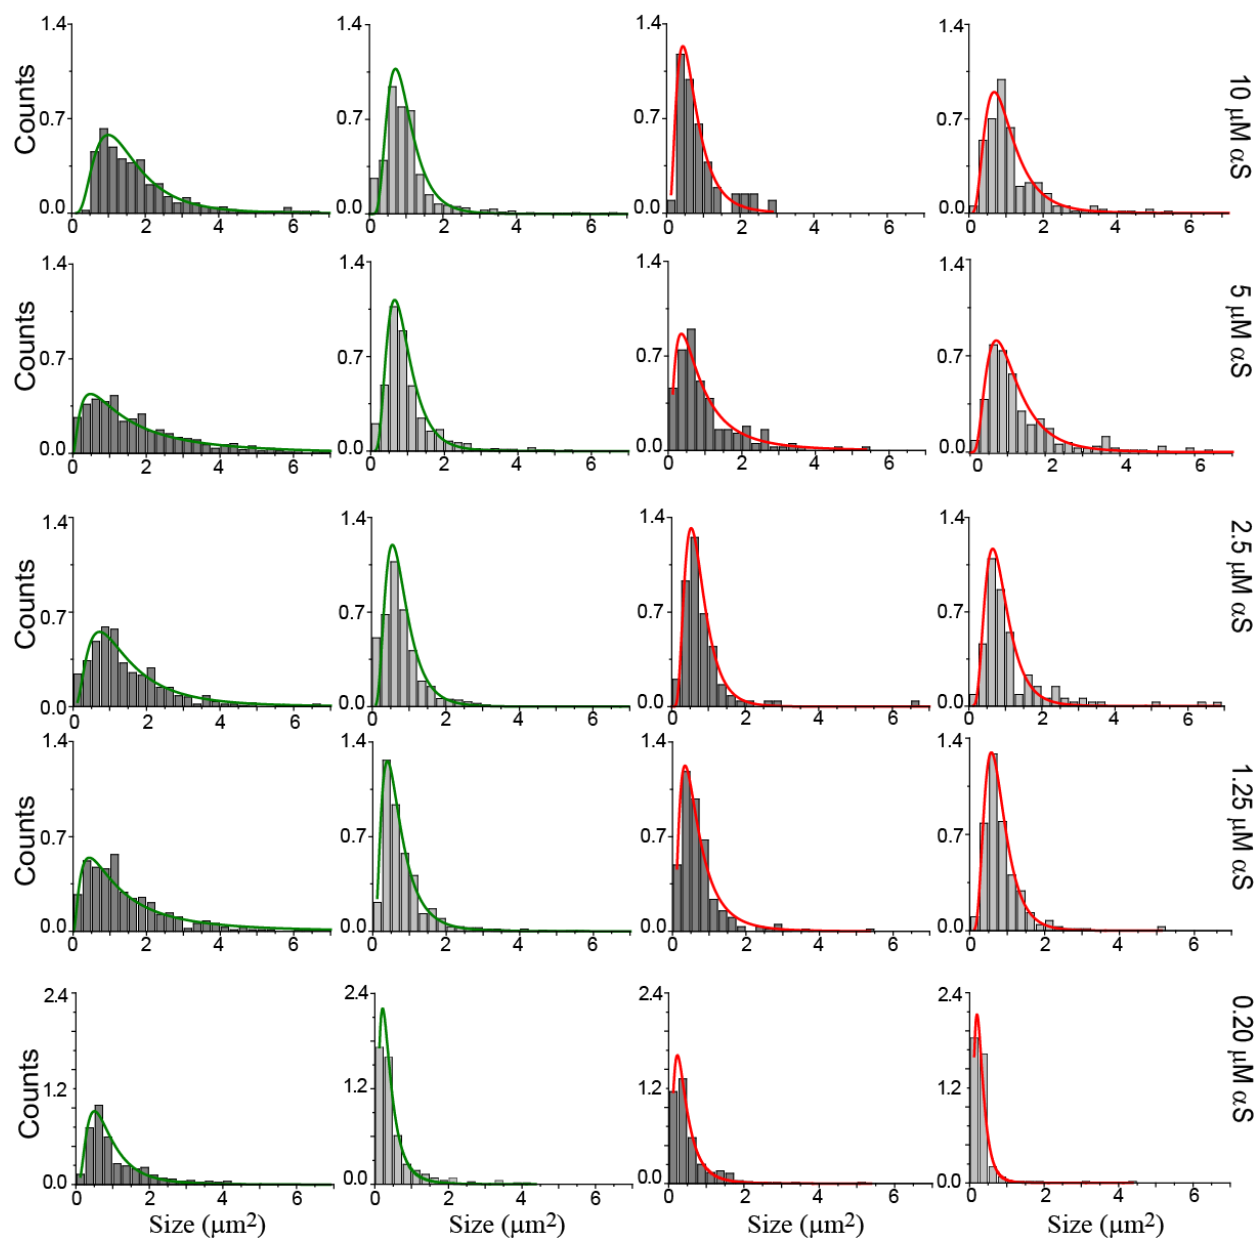

1

2 **Fig S6: Aggregate area histograms of WT- $\alpha$ S and  $\alpha$ S( $\Delta$ 71-82) formed on POPC:POPG**  
 3 **SLBs.** Using the ObjectCount plugin in the Nikon NIS Elements software, a distribution of the  
 4 aggregate areas was obtained. These distributions were area normalized to 1 and were fitted to a  
 5 log-normal distribution. The WT- $\alpha$ S aggregate area distributions are represented by dark grey  
 6 bars and the  $\alpha$ S( $\Delta$ 71-82) aggregate area distributions are represented by light grey bars. The  
 7 aggregates of WT- $\alpha$ S, show a wider distribution (green fits) in 50% POPG SLBs as compared to  
 8 the WT- $\alpha$ S in 25% POPG SLBs (red fits).

9

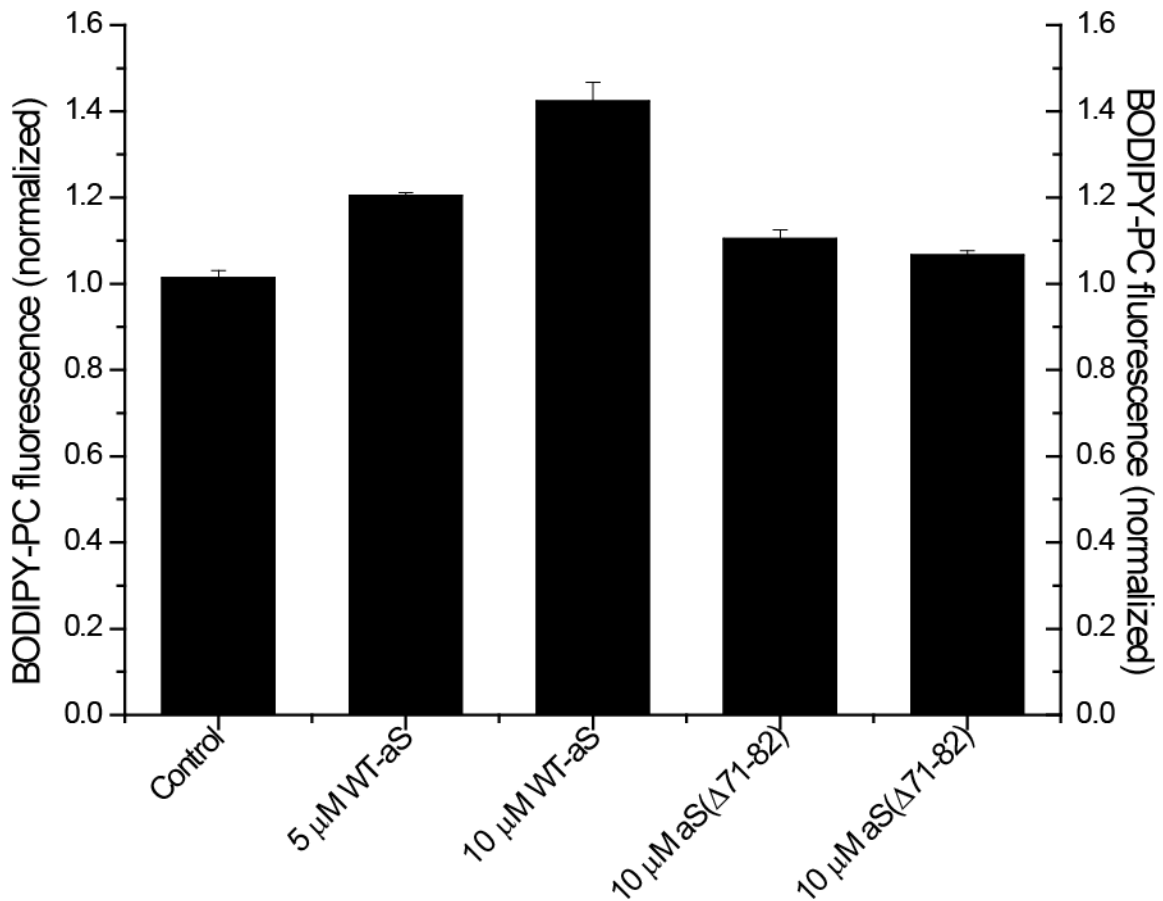

1

2 **Fig S7: Lipid fluorescence in buffer after  $\alpha\text{S}$  incubation on POPC:POPG SLBs.** Relative  
 3 increase in BODIPY-PC fluorescence seen in the buffer above the SLBs after incubation of  $\alpha\text{S}$   
 4 variants over POPC: POPG (50:50) SLBs. All values were obtained by normalizing against the  
 5 fluorescence obtained from buffer before incubation of  $\alpha\text{S}$  variant. All experiments were  
 6 performed at room temperature in 50 mM HEPES, 0.1 mM EDTA, pH 7.4 buffer.

7

|                                                                            | Protein Concentration ( $\mu\text{M}$ ) | Cluster area ( $\mu\text{m}^2$ ) | Number of clusters analysed | Width (s) of curve | Adjusted R- square |
|----------------------------------------------------------------------------|-----------------------------------------|----------------------------------|-----------------------------|--------------------|--------------------|
| <b>WT-<math>\alpha\text{S}</math> on POPC:POPG (50:50) SLBs</b>            | 10                                      | $1.41 \pm 0.02$                  | 589                         | 0.58               | 0.96               |
|                                                                            | 5                                       | $1.50 \pm 0.08$                  | 440                         | 1.09               | 0.95               |
|                                                                            | 2.5                                     | $1.27 \pm 0.07$                  | 447                         | 0.75               | 0.91               |
|                                                                            | 1.25                                    | $1.21 \pm 0.05$                  | 415                         | 0.99               | 0.93               |
|                                                                            | 0.20                                    | $0.78 \pm 0.03$                  | 394                         | 0.66               | 0.94               |
| <b>WT-<math>\alpha\text{S}</math> on POPC:POPG (75:25) SLBs</b>            | 10                                      | $0.77 \pm 0.06$                  | 85                          | 0.60               | 0.97               |
|                                                                            | 5                                       | $0.78 \pm 0.03$                  | 156                         | 0.87               | 0.93               |
|                                                                            | 2.5                                     | $0.68 \pm 0.02$                  | 99                          | 0.50               | 0.98               |
|                                                                            | 1.25                                    | $0.58 \pm 0.02$                  | 237                         | 0.72               | 0.97               |
|                                                                            | 0.20                                    | $0.38 \pm 0.01$                  | 332                         | 0.71               | 0.99               |
| <b><math>\alpha\text{S}(\Delta 71-82)</math> on POPC:POPG (50:50) SLBs</b> | 10                                      | $0.95 \pm 0.02$                  | 880                         | 0.47               | 0.94               |
|                                                                            | 5                                       | $0.85 \pm 0.01$                  | 656                         | 0.49               | 0.96               |
|                                                                            | 2.5                                     | $0.72 \pm 0.03$                  | 676                         | 0.51               | 0.85               |
|                                                                            | 1.25                                    | $0.61 \pm 0.08$                  | 1202                        | 0.64               | 0.99               |
|                                                                            | 0.20                                    | $0.34 \pm 0.02$                  | 307                         | 0.70               | 0.99               |
| <b><math>\alpha\text{S}(\Delta 71-82)</math> on POPC:POPG (75:25) SLBs</b> | 10                                      | $0.93 \pm 0.02$                  | 303                         | 0.55               | 0.93               |
|                                                                            | 5                                       | $0.95 \pm 0.05$                  | 283                         | 0.57               | 0.96               |
|                                                                            | 2.5                                     | $0.81 \pm 0.02$                  | 139                         | 0.46               | 0.93               |
|                                                                            | 1.25                                    | $0.68 \pm 0.04$                  | 277                         | 0.47               | 0.98               |
|                                                                            | 0.20                                    | $0.27 \pm 0.02$                  | 208                         | 0.41               | 0.94               |

- 1
- 2 **Table S8: Cluster sizes of  $\alpha\text{S}$  on POPC: POPG supported lipid bilayers.**
- 3 The above table depicts cluster sizes obtained by fitting the area histograms by a log normal distribution.
- 4 At least 10 images were obtained and used for calculating the cluster areas. The error bars indicate
- 5 standard errors for each measurement.
- 6
